# Supplementary material for: A molecular electron density theory study of the higher-order cycloaddition reactions of tropone with electron-rich ethylenes. The role of the Lewis acid catalyst in the mechanism andpseudocyclicselectivity
Source: Royal Society of Chemistry journal article supplement (doi:10.1039/d1nj04962c), 2021-11-29
Supplement: d1nj04962c1.pdf [file d1nj04962c1.pdf]

## Electronic Supplementary Information

### A Molecular Electron Density Theory Study of the Higher-Order Cycloaddition Reactions of Tropone with Electron-rich Ethylene. The Role of the Lewis Acid Catalyst in the Mechanism and *Pseudocyclic* Selectivity

Luis R. Domingo,<sup>1\*</sup> and Patricia Pérez<sup>2</sup>

<sup>1</sup> Department of Organic Chemistry, University of Valencia, Dr. Moliner 50, 46100 Burjassot, Valencia, Spain.

<sup>2</sup> Universidad Andres Bello, Facultad de Ciencias Exactas, Departamento de Ciencias Químicas, Computational and Theoretical Chemistry Group, Av. República 498 8370146, Chile.

E-mail: luisrdomingo@gmail.com

#### Index

- S2** Figure with the  $\omega$ B97X-D/6-311G(d,p) gas phase geometries of **MC** and **MC-BF**.
- S3** Table with the  $\omega$ B97X-D/6-311G(d,p) and B3LYP-D3BJ/6-311G(d,p) total and relative energies, in gas phase and DCM, of the stationary points involved in the cycloaddition reaction of tropone **11** with CKA **27**.
- S4**  $\omega$ B97X-D/6-311G(d,p) gas phase total and relative energies of the stationary points involved in the cycloaddition reaction of tropone **11** with ketene diethyl acetal **24**.
- S4** Figure with the  $\omega$ B97X-D/6-311G(d,p) gas phase geometries of the TSs involved in the cycloaddition reaction of tropone **11** with ketene diethyl acetal **24**.
- S5** Table with the  $\omega$ B97X-D/6-311G(d,p) and B3LYP-D3BJ/6-311G(d,p) total and relative energies, in gas phase and DCM, of the stationary points involved in the LA BF<sub>3</sub> catalyzed cycloaddition reaction of tropone **11** with CKA **27**.
- S6** Table with the  $\omega$ B97X-D/6-311G(d,p) total and relative enthalpies, entropies and Gibbs free energies for the stationary points involved in the LA BF<sub>3</sub> catalyzed cycloaddition reaction of tropone **11** with CKA **27**.
- S6** Table with the B3LYP-D3BJ/6-311G(d,p) total and relative enthalpies, entropies and Gibbs free energies for the stationary points involved in the LA BF<sub>3</sub> catalyzed cycloaddition reaction of tropone **11** with CKA **27**.
- S7** Table with the  $\omega$ B97X-D/6-311G(d,p) gas phase total relative energies, in gas phase and in DCM, of the stationary points involved in the B(C<sub>6</sub>F<sub>5</sub>)<sub>3</sub> LA catalyzed cycloaddition reactions of tropone **11** with CKA **27**.
- S7** Table with the  $\omega$ B97X-D/6-311G(d,p) total and relative enthalpies, entropies and Gibbs free energies for the stationary points involved in the LA B(C<sub>6</sub>F<sub>5</sub>)<sub>3</sub> catalyzed cycloaddition reaction of tropone **11** with CKA **27**.
- S8**  $\omega$ B97X-D/6-311G(d,p) gas phase computed total energies, unique imaginary frequency, and Cartesian coordinates of the stationary points involved in the non-catalysed and LA catalysed cycloaddition reactions of tropone **11** with CKA **27**.
- S28**  $\omega$ B97X-D/6-311G(d,p) gas phase computed total energies, unique imaginary frequency, and Cartesian coordinates of the stationary points involved in the non-catalyzed and LA catalyzed cycloaddition reactions of tropone **11** with ketene diethyl acetal **24**.

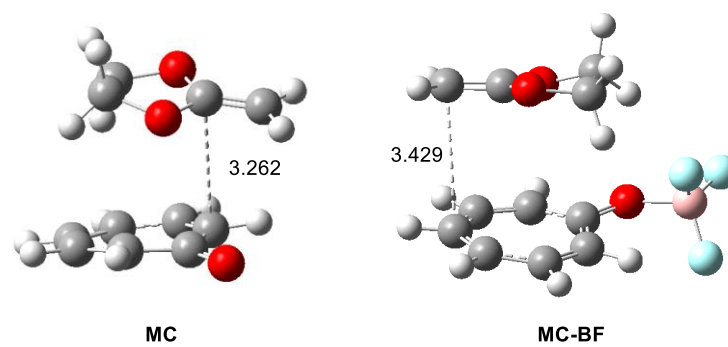

**Figure S1.**  $\omega$ B97X-D/6-311G(d,p) gas phase geometries of **MC** and **MC-BF**. Distances are given in Angstroms.

**Table S1.**  $\omega$ B97X-D/6-311G(d,p) and B3LYP-D3BJ/6-311G(d,p) total (E, in au) and relative ( $\Delta E$ , in kcal mol<sup>-1</sup>) energies, with respect to the separated reagents, in gas phase and DCM, of the stationary points involved in the cycloaddition reaction of tropone **11** with CKA **27**.

|              | $\omega$ B97X-D |            |             |            | B3LYP-D3BJ   |            |
|--------------|-----------------|------------|-------------|------------|--------------|------------|
|              | Gas phase       |            | DCM         |            |              |            |
|              | E               | $\Delta E$ | E           | $\Delta E$ | E            | $\Delta E$ |
| <b>11</b>    | -345.495830     |            | -345.503648 |            | -345.6589668 |            |
| <b>27</b>    | -306.422249     |            | -306.428322 |            | -306.5461649 |            |
| <b>MC</b>    | -651.928580     | -6.6       | -651.941504 | -6.0       | -652.2149066 | -6.1       |
| <b>TS-11</b> | -651.896966     | 13.2       | -651.912728 | 12.1       | -652.1889782 | 10.1       |
| <b>IN-1</b>  | -651.897896     | 12.7       | -651.922289 | 6.1        | -652.1911405 | 8.8        |
| <b>TS-12</b> | -651.896731     | 13.4       | -651.920578 | 7.1        | -652.1906456 | 9.1        |
| <b>TS-2</b>  | -651.899627     | 11.6       | -651.910768 | 13.3       | -652.1894882 | 9.8        |
| <b>TS-3</b>  | -651.892775     | 15.9       | -651.907238 | 15.5       | -652.1819086 | 14.6       |
| <b>28</b>    | -651.964067     | -28.9      | -651.973712 | -26.2      | -652.2330190 | -17.5      |
| <b>29</b>    | -651.965842     | -30.0      | -651.973227 | -25.9      | -652.2341419 | -18.2      |
| <b>30</b>    | -651.965245     | -29.6      | -651.974389 | -26.6      | -652.2334177 | -17.7      |

**Table S2.**  $\omega$ B97X-D/6-311G(d,p) gas phase total (E, in au) and relative ( $\Delta E$ , in kcal mol<sup>-1</sup>) energies, with respect to the separated reagents of the stationary points involved in the cycloaddition reaction of tropone **11** with ketene diethyl acetal **24**.

|                  | E           | $\Delta E$ |
|------------------|-------------|------------|
| <b>11</b>        | -345.49583  |            |
| <b>24</b>        | -386.258367 |            |
| <b>MC-exp</b>    | -731.771015 | -10.6      |
| <b>TS-11-exp</b> | -731.734167 | 12.6       |
| <b>IN-1-exp</b>  | -731.739458 | 9.2        |
| <b>TS-12-exp</b> | -731.738615 | 9.8        |
| <b>TS-2-exp</b>  | -731.736726 | 11.0       |
| <b>TS-3-exp</b>  | -731.731742 | 14.1       |
| <b>28-exp</b>    | -731.802069 | -30.0      |
| <b>29-exp</b>    | -731.800802 | -29.2      |
| <b>30-exp</b>    | -731.793099 | -24.4      |

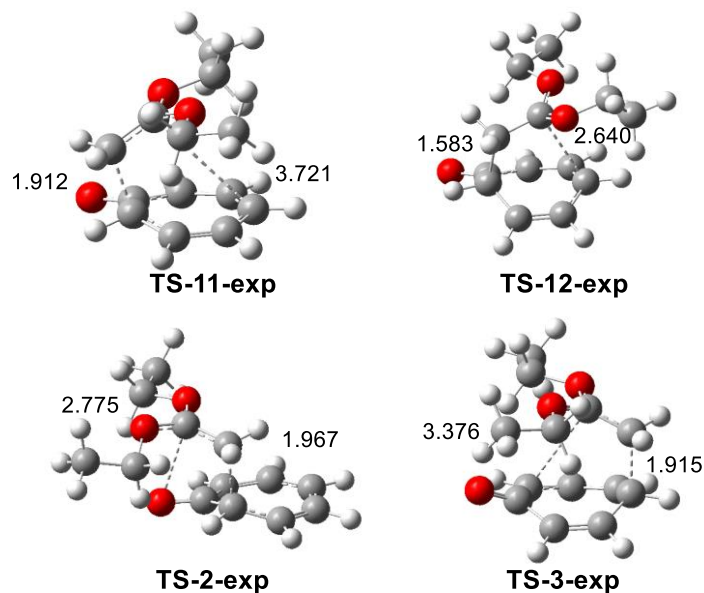

**Figure S2.**  $\omega$ B97X-D/6-311G(d,p) Gas phase geometries of the transition state structures involved in the cycloaddition reaction of tropone **11** with ketene diethyl acetal **24**. Distances are given in Angstroms.

**Table S3.**  $\omega$ B97X-D/6-311G(d,p) and B3LYP-D3BJ/6-311G(d,p) total (E, in au) and relative ( $\Delta E$ , in kcal mol<sup>-1</sup>) energies, with respect to the separated reagents, in gas phase and in DCM, of the stationary points involved in the LA BF<sub>3</sub> catalyzed cycloaddition reaction of tropone **11** with CKA **27**.

|                | $\omega$ B97X-D |            |             |            | B3LYP- D3BJ |            |
|----------------|-----------------|------------|-------------|------------|-------------|------------|
|                | Gas phase       |            | DCM         |            |             |            |
|                | E               | $\Delta E$ | E           | $\Delta E$ | E           | $\Delta E$ |
| <b>31</b>      | -670.085140     |            | -670.106186 |            | -670.360034 |            |
| <b>27</b>      | -306.422249     |            | -306.428322 |            | -306.546165 |            |
| <b>MC-BF</b>   | -976.528918     | -13.5      | -976.548621 | -8.9       | -976.921274 | -9.5       |
| <b>TS-BF-1</b> | -976.500634     | 4.2        | -976.529446 | 3.2        | -976.904264 | 1.2        |
| <b>TS-BF-2</b> | -976.514671     | -4.6       | -976.532615 | 1.2        | -976.909659 | -2.2       |
| <b>TS-BF-3</b> | -976.505453     | 1.2        | -976.529513 | 3.1        | -976.904244 | 1.2        |
| <b>33</b>      | -976.547209     | -25.0      | -976.565555 | -19.5      | -976.923102 | -10.6      |
| <b>34</b>      | -976.541275     | -21.3      | -976.562091 | -17.3      | -976.924566 | -11.5      |
| <b>35</b>      | -976.548678     | -25.9      | -976.566363 | -20.0      | -976.923477 | -10.8      |

**Table S4.**  $\omega$ B97X-D/6-311G(d,p) Total enthalpies (H, in a.u.), entropies (S, in cal/mol.K) and Gibbs free energies (G, in a.u.), and relative enthalpies ( $\Delta$ H in kcal·mol<sup>-1</sup>), entropies, ( $\Delta$ S in cal·mol<sup>-1</sup>K<sup>-1</sup>), and Gibbs free energies ( $\Delta$ G in kcal·mol<sup>-1</sup>), with respect to the separated reagents, computed at 273.15 K and 1 atm in DCM, for the stationary points involved in the BF<sub>3</sub> LA catalyzed cycloaddition reaction of tropone **11** with CKA **27**.

|                | H           | $\Delta$ H | S     | $\Delta$ S | G           | $\Delta$ G |
|----------------|-------------|------------|-------|------------|-------------|------------|
| <b>31</b>      | -669.970659 |            | 98.4  |            | -670.013482 |            |
| <b>27</b>      | -306.324813 |            | 70.3  |            | -306.355419 |            |
| <b>MC-BF</b>   | -976.307607 | -7.6       | 135.9 | -32.8      | -976.366754 | 1.3        |
| <b>TS-BF-1</b> | -976.288960 | 4.1        | 124.7 | -44.0      | -976.343249 | 16.1       |
| <b>TS-BF-2</b> | -976.292040 | 2.2        | 123.3 | -45.4      | -976.345721 | 14.5       |
| <b>TS-BF-3</b> | -976.289145 | 4.0        | 125.0 | -43.7      | -976.343557 | 15.9       |
| <b>33</b>      | -976.322532 | -17.0      | 121.5 | -47.2      | -976.375427 | -4.1       |
| <b>34</b>      | -976.319267 | -14.9      | 121.1 | -47.6      | -976.371996 | -1.9       |
| <b>35</b>      | -976.323018 | -17.3      | 120.1 | -48.6      | -976.375279 | -4.0       |

**Table S5.** B3LYP-D3BJ/6-311G(d,p) Total enthalpies (H, in a.u.), entropies (S, in cal/mol.K) and Gibbs free energies (G, in a.u.), and relative enthalpies ( $\Delta$ H in kcal·mol<sup>-1</sup>), entropies, ( $\Delta$ S in cal·mol<sup>-1</sup>K<sup>-1</sup>), and Gibbs free energies ( $\Delta$ G in kcal·mol<sup>-1</sup>), with respect to the separated reagents, computed at 273.15 K and 1 atm in DCM, for the stationary points involved in the BF<sub>3</sub> LA catalyzed cycloaddition reaction of tropone **11** with CKA **27**.

|                | H           | $\Delta$ H | S     | $\Delta$ S | G           | $\Delta$ G |
|----------------|-------------|------------|-------|------------|-------------|------------|
| <b>31</b>      | -306.443775 |            | 70.5  |            | -306.474459 |            |
| <b>27</b>      | -670.225601 |            | 99.2  |            | -670.268764 |            |
| <b>TS-BF-1</b> | -976.665665 | 2.3        | 124.6 | -45.1      | -976.719902 | 14.6       |
| <b>TS-BF-2</b> | -976.670992 | -1.0       | 123.6 | -46.1      | -976.724774 | 11.6       |
| <b>TS-BF-3</b> | -976.665715 | 2.3        | 123.2 | -46.5      | -976.719336 | 15.0       |
| <b>33</b>      | -976.682424 | -8.2       | 121.8 | -47.9      | -976.735432 | 4.9        |
| <b>34</b>      | -976.684119 | -9.3       | 122.4 | -47.2      | -976.737418 | 3.6        |
| <b>35</b>      | -976.682543 | -8.3       | 121.2 | -48.4      | -976.735308 | 5.0        |

**Table S6.**  $\omega$ B97X-D/6-311G(d,p) total (E, in au) and relative ( $\Delta E$ , in kcal mol<sup>-1</sup>) energies, in gas phase and in DCM, with respect to the separated reagents, of the stationary points involved in the B(C<sub>6</sub>F<sub>5</sub>)<sub>3</sub> LA catalyzed cycloaddition reactions of tropone **11** with CKA **27**.

|                  | E            | $\Delta E$ | E            | $\Delta E$ |
|------------------|--------------|------------|--------------|------------|
| <b>32</b>        | -2553.749157 |            | -2553.766893 |            |
| <b>27</b>        | -306.4222490 |            |              |            |
| <b>MC-BPhF</b>   | -2860.195151 | -14.9      | -2860.212066 | -10.6      |
| <b>TS-BPhF-1</b> | -2860.175239 | -2.4       | -2860.196851 | -1.0       |
| <b>TS-BPhF-2</b> | -2860.170648 | 0.5        | -2860.18666  | 5.4        |
| <b>36</b>        | -2860.217370 | -28.8      | -2860.231873 | -23.0      |
| <b>37</b>        | -2860.200050 | -18.0      | -2860.209201 | -8.8       |

**Table S7.**  $\omega$ B97X-D/6-311G(d,p) Total enthalpies (H, in a.u.), entropies (S, in cal/mol.K) and Gibbs free energies (G, in a.u.), and relative enthalpies ( $\Delta H$  in kcal·mol<sup>-1</sup>), entropies, ( $\Delta S$  in cal·mol<sup>-1</sup>K<sup>-1</sup>), and Gibbs free energies ( $\Delta G$  in kcal·mol<sup>-1</sup>), with respect to the separated reagents, computed at 273.15 K and 1 atm in DCM, for the stationary points involved in the B(C<sub>6</sub>F<sub>5</sub>)<sub>3</sub> LA catalyzed cycloaddition reaction of tropone **11** with CKA **27**.

|                  | H           | $\Delta H$ | S     | $\Delta S$ | G           | $\Delta G$ |
|------------------|-------------|------------|-------|------------|-------------|------------|
| <b>32</b>        | -2553.46565 |            | 209.6 |            | -2553.55691 |            |
| <b>27</b>        | -306.324813 |            | 70.3  |            | -306.355419 |            |
| <b>MC-BPhF</b>   | -2859.80508 | -9.2       | 243.0 | -37.0      | -2859.91085 | 0.9        |
| <b>TS-BPhF-1</b> | -2859.79062 | -0.1       | 234.1 | -45.9      | -2859.89251 | 12.4       |
| <b>TS-BPhF-2</b> | -2859.78071 | 6.1        | 232.0 | -47.9      | -2859.88172 | 19.2       |
| <b>36</b>        | -2859.82304 | -20.4      | 227.1 | -52.9      | -2859.9219  | -6.0       |
| <b>37</b>        | -2859.80090 | -6.6       | 238.3 | -41.6      | -2859.90464 | 4.8        |

$\omega$ B97X-D/6-311G(d,p) gas phase computed total energies, unique imaginary frequency, and Cartesian coordinates of the stationary points involved in the non-catalyzed and LA catalyzed cycloaddition reactions of tropone **11** with CKA **27**.

**11**

E = -345.495830 a.u.

|   |             |             |             |
|---|-------------|-------------|-------------|
| C | 1.84228500  | 0.67659800  | -0.00009900 |
| C | 1.84301900  | -0.67573800 | -0.00012100 |
| C | 0.71353100  | -1.56137500 | -0.00002100 |
| C | -0.60792600 | -1.28510100 | 0.00003000  |
| C | 0.71220100  | 1.56146600  | 0.00005900  |
| C | -0.60928300 | 1.28511100  | 0.00011900  |
| C | -1.32591300 | -0.00020800 | 0.00009100  |
| H | 2.81181900  | 1.16503700  | -0.00020700 |
| H | 2.81303700  | -1.16320300 | -0.00023700 |
| H | 0.97125900  | -2.61709800 | -0.00000500 |
| H | -1.29774800 | -2.12390500 | 0.00006200  |
| H | -1.29878000 | 2.12412000  | 0.00021000  |
| O | -2.54708600 | -0.00084500 | -0.00003600 |
| H | 0.96961300  | 2.61729600  | 0.00012600  |

**27**

E = -306.422249 a.u.

|   |             |             |             |
|---|-------------|-------------|-------------|
| C | 0.00000000  | 0.00000000  | 2.11513500  |
| C | 0.00000000  | 0.00000000  | 0.78898700  |
| H | -0.05314800 | 0.93544400  | 2.64982200  |
| H | 0.05314800  | -0.93544400 | 2.64982200  |
| O | 0.00000000  | 1.11696500  | 0.01706200  |
| O | 0.00000000  | -1.11696500 | 0.01706200  |
| C | 0.24471900  | -0.72006400 | -1.32705900 |
| H | 1.31584600  | -0.78856700 | -1.54423800 |
| H | -0.31153200 | -1.37881700 | -1.99209000 |
| C | -0.24471900 | 0.72006400  | -1.32705900 |
| H | -1.31584600 | 0.78856700  | -1.54423800 |
| H | 0.31153200  | 1.37881700  | -1.99209000 |

**MC**

E = -651.928580 a.u.

|   |             |             |             |
|---|-------------|-------------|-------------|
| C | 2.37548400  | 1.44288300  | -0.04573100 |
| C | 2.16101400  | 1.07307100  | 1.23860300  |
| C | 1.49002900  | -0.09952100 | 1.72339200  |
| C | 1.00954500  | -1.16490100 | 1.04737700  |
| C | -2.32779900 | -1.50237700 | 0.79727100  |



|   |             |             |             |
|---|-------------|-------------|-------------|
| C | -2.04439600 | -0.31362800 | 0.28114200  |
| C | 1.97716000  | 0.75333900  | -1.24052300 |
| C | 1.39755800  | -0.45717900 | -1.38937700 |
| C | 1.04781100  | -1.48102500 | -0.39022000 |
| H | 2.89251000  | 2.38445400  | -0.20409600 |
| H | 2.52115900  | 1.75018500  | 2.00728000  |
| H | 1.36369200  | -0.13208700 | 2.80188100  |
| H | 0.54002100  | -1.95897300 | 1.61769200  |
| H | 1.18102100  | -0.79598800 | -2.39789600 |
| O | 0.75161000  | -2.60227800 | -0.76537300 |
| H | 2.18769200  | 1.29108200  | -2.16175400 |
| O | -2.03526400 | 0.85053700  | 0.97716000  |
| O | -1.70804800 | -0.10219300 | -1.01658700 |
| C | -1.43050100 | 1.84602100  | 0.15719100  |
| C | -1.67262600 | 1.30153100  | -1.24207900 |
| H | -1.91855400 | 2.80005000  | 0.35167400  |
| H | -0.36321700 | 1.91451200  | 0.38680400  |
| H | -2.63109700 | 1.63087800  | -1.65591800 |
| H | -0.86643300 | 1.51877100  | -1.94165600 |
| H | -2.54036300 | -1.58776200 | 1.85175100  |
| H | -2.33248400 | -2.37294100 | 0.16036400  |

**TS-11**

E = -651.896966 a.u.

1 imaginary frequency -351.0184 cm<sup>-1</sup>

|   |             |             |             |
|---|-------------|-------------|-------------|
| C | 0.29321400  | 2.29507700  | -0.08696000 |
| C | 0.53893400  | 1.88553400  | 1.22676300  |
| C | 1.08233500  | 0.70744700  | 1.68998800  |
| C | 1.38294700  | -0.49638700 | 0.97111800  |
| C | 0.01837300  | -1.76368700 | 1.07660500  |
| C | -1.04748700 | -1.16931800 | 0.41063000  |
| C | 0.73152900  | 1.64699600  | -1.25021200 |
| C | 1.40378300  | 0.45851700  | -1.42962700 |
| C | 1.78041100  | -0.56202800 | -0.48793900 |
| H | -0.15395300 | 3.27543400  | -0.21862100 |
| H | 0.29257300  | 2.61454000  | 1.99620700  |
| H | 1.23389700  | 0.64363200  | 2.76393000  |
| H | 2.07256100  | -1.14098900 | 1.51387300  |
| H | 1.70885200  | 0.20724400  | -2.44064600 |
| O | 2.39632400  | -1.56681400 | -0.83838700 |
| H | 0.54247600  | 2.19742000  | -2.17132300 |
| O | -1.88827300 | -0.36021900 | 1.01228000  |
| O | -1.15255500 | -1.17541400 | -0.89634800 |
| C | -2.50919700 | 0.47981100  | 0.02353700  |
| C | -2.12240900 | -0.19151700 | -1.29841200 |
| H | -3.57880600 | 0.50194000  | 0.22037700  |
| H | -2.06027800 | 1.47170400  | 0.11677500  |
| H | -2.94234800 | -0.71220900 | -1.79253900 |
| H | -1.62614700 | 0.49455100  | -1.98312200 |
| H | -0.13163300 | -1.88164700 | 2.14268000  |

H            0.48423900 -2.59470900 0.55908300

### IN-1

E = 651.897896 a.u.

|   |             |             |             |
|---|-------------|-------------|-------------|
| C | 0.04693200  | 2.22498400  | -0.12840700 |
| C | 0.38690600  | 1.89411700  | 1.20449400  |
| C | 1.03945000  | 0.79641100  | 1.67989800  |
| C | 1.38863500  | -0.44012500 | 0.96920400  |
| C | 0.21941500  | -1.63849400 | 1.08718000  |
| C | -0.94109400 | -1.16007400 | 0.41640300  |
| C | 0.57084800  | 1.62377500  | -1.27186600 |
| C | 1.40074600  | 0.52621400  | -1.43798900 |
| C | 1.85415500  | -0.44556700 | -0.49189600 |
| H | -0.50854900 | 3.14639800  | -0.27514600 |
| H | 0.12184500  | 2.64059200  | 1.95137700  |
| H | 1.26747100  | 0.78630000  | 2.74224300  |
| H | 2.18488400  | -0.96004300 | 1.50527600  |
| H | 1.75240000  | 0.31636600  | -2.44314000 |
| O | 2.58260200  | -1.38781400 | -0.80589800 |
| H | 0.31583100  | 2.13095500  | -2.20302600 |
| O | -1.84775800 | -0.45384300 | 1.02269000  |
| O | -1.07078600 | -1.22987700 | -0.87168000 |
| C | -2.60935500 | 0.27121200  | 0.03308900  |
| C | -2.12626900 | -0.33626600 | -1.28972700 |
| H | -3.66513900 | 0.12020300  | 0.24576300  |
| H | -2.31438000 | 1.31861000  | 0.12374300  |
| H | -2.87079500 | -0.92942500 | -1.81757800 |
| H | -1.66919500 | 0.40572400  | -1.94263200 |
| H | 0.02791000  | -1.80414900 | 2.14376400  |
| H | 0.66304000  | -2.49637000 | 0.58615300  |

### TS-12

E = -651.896731 a.u.

1 imaginary frequency -75.5334  $\text{cm}^{-1}$

|   |             |             |             |
|---|-------------|-------------|-------------|
| C | 0.12277100  | 1.59982300  | 0.98989000  |
| C | -0.43549300 | 2.13666400  | -0.20566200 |
| C | -1.26802800 | 1.49808800  | -1.06041500 |
| C | -1.53236300 | 0.04247300  | -1.03167200 |
| C | -0.26220800 | -0.83834700 | -1.50349100 |
| C | 0.95163600  | -0.65376600 | -0.74219500 |
| C | -0.46456800 | 0.59932600  | 1.77747600  |
| C | -1.50034300 | -0.27279200 | 1.51631500  |
| C | -2.11361400 | -0.56546800 | 0.25369400  |
| H | 0.86513400  | 2.21634000  | 1.49111500  |
| H | -0.18164600 | 3.17018400  | -0.43354300 |
| H | -1.69790100 | 2.05292200  | -1.88761700 |
| H | -2.26788300 | -0.21693700 | -1.79434000 |
| H | -1.87013800 | -0.88594400 | 2.33118900  |

|   |             |             |             |
|---|-------------|-------------|-------------|
| O | -3.04621700 | -1.35292000 | 0.12082500  |
| H | -0.05142900 | 0.52127600  | 2.78458400  |
| O | 1.91221300  | 0.12838600  | -1.14772700 |
| O | 1.25257700  | -1.39811700 | 0.27901200  |
| C | 2.89262800  | 0.21609100  | -0.09775600 |
| C | 2.43333000  | -0.85841000 | 0.90043500  |
| H | 3.87015100  | 0.03768900  | -0.54065300 |
| H | 2.82002300  | 1.21941900  | 0.32096300  |
| H | 3.13477100  | -1.67748000 | 1.04387300  |
| H | 2.12307700  | -0.43056200 | 1.85346200  |
| H | -0.05753700 | -0.56809300 | -2.53825500 |
| H | -0.57769100 | -1.87969600 | -1.42737400 |

**TS-2**

E = -651.899627 a.u.

1 imaginary frequency -424.6756 cm<sup>-1</sup>

|   |             |             |             |
|---|-------------|-------------|-------------|
| C | 3.16602300  | -0.86078700 | 0.09924600  |
| C | 3.27259400  | 0.41239700  | 0.66216000  |
| C | 2.41456300  | 1.48776400  | 0.44344200  |
| C | 2.10716600  | -1.40935700 | -0.58969900 |
| C | 1.25173300  | 1.58664500  | -0.30220600 |
| C | 0.78520000  | -0.88401900 | -0.72602500 |
| C | 0.46757500  | 0.56852600  | -0.90659800 |
| H | 4.03685400  | -1.50252400 | 0.21395400  |
| H | 4.16435200  | 0.61607900  | 1.24544700  |
| H | 2.73635500  | 2.42353000  | 0.89617600  |
| H | 2.24121100  | -2.42215400 | -0.95911600 |
| H | 0.81684500  | 2.57539400  | -0.41181600 |
| H | 0.16679100  | -1.44827400 | -1.42068600 |
| O | -0.59296100 | 0.82058100  | -1.50997100 |
| C | -1.40222300 | -0.70830400 | 0.70214400  |
| C | -0.18527300 | -1.36174800 | 0.85654900  |
| H | 0.45130700  | -0.96966600 | 1.64053600  |
| H | -0.21723800 | -2.43863600 | 0.75451200  |
| O | -2.39543500 | -1.18449400 | -0.01871800 |
| O | -1.60240600 | 0.50934400  | 1.14848100  |
| C | -3.22934100 | -0.07965300 | -0.41891500 |
| C | -2.73866600 | 1.07406800  | 0.46433000  |
| H | -2.37546800 | 1.91080400  | -0.12709700 |
| H | -3.45426300 | 1.39318800  | 1.22136900  |
| H | -3.03089300 | 0.11078300  | -1.47144100 |
| H | -4.26554400 | -0.36516900 | -0.24674600 |

**TS-3**

E = -651.892775 a.u.

1 imaginary frequency -419.1234 cm<sup>-1</sup>

|   |            |             |             |
|---|------------|-------------|-------------|
| C | 1.86646800 | -1.07445400 | -0.36906800 |
|---|------------|-------------|-------------|

|   |             |             |             |
|---|-------------|-------------|-------------|
| C | 2.10173400  | -0.76013200 | 1.01028800  |
| C | 1.56628700  | 0.31915000  | 1.68165100  |
| C | 0.73870900  | 1.34036100  | 1.22116900  |
| C | -0.84936800 | -1.26642400 | -0.26077700 |
| C | 0.27105900  | -2.03806600 | -0.58976500 |
| C | 1.83183800  | 0.01321000  | -1.36407100 |
| C | 1.21039800  | 1.19307200  | -1.24727100 |
| C | 0.39134800  | 1.69338700  | -0.12111800 |
| H | 2.49846900  | -1.89222000 | -0.71102500 |
| H | 2.66230300  | -1.48750800 | 1.58748800  |
| H | 1.77611100  | 0.34791400  | 2.74915100  |
| H | 0.30761800  | 2.00707700  | 1.96345500  |
| H | 1.21858100  | 1.87222400  | -2.09468700 |
| O | -0.54034500 | 2.47292700  | -0.38134300 |
| H | 2.33047700  | -0.20347000 | -2.30589100 |
| H | 0.43383100  | -2.86636500 | 0.08927200  |
| H | 0.31225200  | -2.29729100 | -1.64212700 |
| O | -1.36244900 | -1.23370200 | 0.94706400  |
| O | -1.46803000 | -0.49746400 | -1.12553900 |
| C | -2.54087500 | 0.20039300  | -0.44561700 |
| H | -3.48223900 | -0.23114600 | -0.79076100 |
| H | -2.45091000 | 1.25407800  | -0.69420600 |
| C | -2.23417600 | -0.08697400 | 1.02207000  |
| H | -1.66165700 | 0.72201000  | 1.48136800  |
| H | -3.09876800 | -0.36051700 | 1.62156400  |

28

E = -651.964067 a.u.

|   |             |             |             |
|---|-------------|-------------|-------------|
| C | -0.22067700 | -0.24213400 | 1.18068800  |
| C | 0.51085100  | -1.56706900 | 1.13916300  |
| C | 1.34977000  | -1.77929100 | 0.13577600  |
| C | 1.52361100  | -0.68320700 | -0.89051500 |
| C | 0.13885900  | -0.15699900 | -1.34331500 |
| C | -0.88616600 | -0.02615500 | -0.20884200 |
| C | 0.69525600  | 0.91829600  | 1.49229300  |
| C | 1.82850800  | 1.20545700  | 0.84813500  |
| C | 2.37009400  | 0.44952000  | -0.30776700 |
| H | -1.01986600 | -0.26793400 | 1.92344500  |
| H | 0.31953800  | -2.30603100 | 1.90752000  |
| H | 1.91296400  | -2.69908500 | 0.03304500  |
| H | 2.07467800  | -1.04149100 | -1.75981900 |
| H | 2.43256800  | 2.05516400  | 1.14834100  |
| O | 3.43973400  | 0.74412000  | -0.79105600 |
| H | 0.38687600  | 1.57253400  | 2.30183800  |
| O | -1.91403600 | -0.97550400 | -0.40166200 |
| O | -1.51503700 | 1.24954100  | -0.21724200 |
| C | -3.11970700 | -0.37611600 | 0.02824500  |
| C | -2.91141500 | 1.07371800  | -0.38063700 |
| H | -3.94806300 | -0.86902200 | -0.47932000 |
| H | -3.24924100 | -0.47560400 | 1.11417900  |

|   |             |             |             |
|---|-------------|-------------|-------------|
| H | -3.19606700 | 1.23724400  | -1.42638900 |
| H | -3.43706900 | 1.78801400  | 0.25484800  |
| H | -0.27624000 | -0.85211800 | -2.07297700 |
| H | 0.24072600  | 0.81695700  | -1.82438300 |

**29**

E = -651.965842 a.u.

|   |             |             |             |
|---|-------------|-------------|-------------|
| C | -3.30799700 | 0.97382500  | 0.17178000  |
| C | -3.69727800 | -0.37419200 | -0.18278500 |
| C | -2.92067000 | -1.47768400 | -0.06271100 |
| C | -2.06738800 | 1.47733000  | 0.11562500  |
| C | -1.54598000 | -1.54770300 | 0.36531700  |
| C | -0.91080300 | 0.75156500  | -0.51784500 |
| C | -0.66774300 | -0.54249200 | 0.22429500  |
| H | -4.09872600 | 1.61452500  | 0.55407200  |
| H | -4.74102100 | -0.52501300 | -0.44181600 |
| H | -3.40151800 | -2.43641300 | -0.23847400 |
| H | -1.87294500 | 2.46604300  | 0.52240900  |
| H | -1.18907200 | -2.47444300 | 0.80046400  |
| H | -1.14489700 | 0.51845000  | -1.56343800 |
| O | 0.59718300  | -0.60418000 | 0.70036200  |
| C | 1.40098700  | 0.35832400  | -0.00125900 |
| C | 0.43937800  | 1.46442300  | -0.39056300 |
| H | 0.42771600  | 2.19006100  | 0.42470400  |
| H | 0.77357900  | 1.95475400  | -1.30249000 |
| O | 1.97657500  | -0.24128100 | -1.11279700 |
| O | 2.42773800  | 0.74816700  | 0.83079300  |
| C | 3.10032000  | -0.95097200 | -0.61180300 |
| C | 3.57142900  | -0.05321900 | 0.53977900  |
| H | 3.86018800  | -0.62225500 | 1.42494800  |
| H | 4.38846600  | 0.61010700  | 0.24720900  |
| H | 2.79429000  | -1.93943600 | -0.25712300 |
| H | 3.82645800  | -1.05325700 | -1.41630400 |

**30**

E = -651.965245 a.u.

|   |             |             |             |
|---|-------------|-------------|-------------|
| C | 1.78631400  | -1.21918100 | 0.53310400  |
| C | 1.87703200  | -1.29779900 | -0.97902700 |
| C | 1.00977700  | -0.58283500 | -1.68111500 |
| C | 0.03231400  | 0.28682700  | -0.93096900 |
| C | -0.65774300 | -0.53539700 | 0.20653500  |
| C | 0.31164100  | -1.46832000 | 0.92900800  |
| C | 2.26675800  | 0.12021300  | 1.04972100  |
| C | 1.79772500  | 1.30919200  | 0.66495000  |
| C | 0.71130200  | 1.51470500  | -0.32210900 |
| H | 2.39636800  | -2.00271900 | 0.98478600  |
| H | 2.61745700  | -1.93907100 | -1.44266400 |
| H | 0.98917600  | -0.58928200 | -2.76391900 |

|   |             |             |             |
|---|-------------|-------------|-------------|
| H | -0.73451100 | 0.67796900  | -1.60040100 |
| H | 2.19668000  | 2.22560500  | 1.08638700  |
| O | 0.35050600  | 2.62990800  | -0.62481900 |
| H | 3.04868200  | 0.09860500  | 1.80422100  |
| H | 0.04157000  | -2.49093300 | 0.66361700  |
| H | 0.16520000  | -1.33818200 | 2.00171700  |
| O | -1.71907600 | -1.28863100 | -0.33624700 |
| O | -1.26373800 | 0.33586100  | 1.13385700  |
| C | -2.49144700 | 0.73765600  | 0.55238600  |
| H | -3.20755000 | 0.89968500  | 1.35745800  |
| H | -2.36397800 | 1.66855800  | -0.01050000 |
| C | -2.86133300 | -0.44674600 | -0.36809300 |
| H | -3.07305100 | -0.11477600 | -1.38988500 |
| H | -3.71162000 | -1.02244900 | 0.00050600  |

**31**

E = -670.085140 a.u.

|   |             |             |             |
|---|-------------|-------------|-------------|
| C | 3.40698400  | 0.25666400  | -0.00001800 |
| C | 3.02553600  | -1.04978300 | -0.00011200 |
| C | 1.70576400  | -1.57422100 | -0.00009700 |
| C | 2.56915800  | 1.40236100  | -0.00015800 |
| C | 0.49730400  | -0.94883600 | 0.00030700  |
| C | 1.21280000  | 1.49387100  | 0.00011200  |
| C | 0.20804700  | 0.46284100  | 0.00058500  |
| H | 4.47355400  | 0.45589700  | 0.00013500  |
| H | 3.81954500  | -1.78942800 | -0.00009800 |
| H | 1.65280200  | -2.65892600 | -0.00025900 |
| H | 3.09484100  | 2.35259200  | -0.00048800 |
| H | -0.38067100 | -1.58074800 | 0.00053000  |
| H | 0.77705700  | 2.48752300  | 0.00008600  |
| O | -0.98028900 | 0.88782500  | 0.00105300  |
| B | -2.30944800 | -0.03048100 | -0.00015700 |
| F | -3.32273500 | 0.87163200  | 0.00006800  |
| F | -2.21586100 | -0.79464900 | -1.14742600 |
| F | -2.21708600 | -0.79637100 | 1.14610800  |

**MC-BF**

E = -976.528918 a.u.

|   |             |             |             |
|---|-------------|-------------|-------------|
| C | -1.71817800 | 2.46331000  | -0.94784500 |
| C | -2.31198000 | 2.14346000  | 0.23589800  |
| C | -1.71372700 | 1.54326100  | 1.37105100  |
| C | -0.45571800 | 1.05084100  | 1.53721600  |
| C | -3.47303100 | -1.07074400 | 0.51391500  |
| C | -2.27921100 | -1.44484600 | 0.05484700  |
| C | -0.36563100 | 2.26631400  | -1.31868500 |
| C | 0.65222400  | 1.63660400  | -0.66642500 |
| C | 0.62177300  | 0.96173900  | 0.59919300  |
| H | -2.34319700 | 2.94099300  | -1.69476500 |

|   |             |             |             |
|---|-------------|-------------|-------------|
| H | -3.36473400 | 2.38338800  | 0.33701300  |
| H | -2.37038000 | 1.43128400  | 2.22714200  |
| H | -0.21926800 | 0.58435200  | 2.48665200  |
| H | 1.61173800  | 1.60320500  | -1.16648000 |
| O | 1.60093000  | 0.24682800  | 0.98343600  |
| H | -0.09943100 | 2.66830800  | -2.29190400 |
| O | -1.94815400 | -1.50889200 | -1.25076700 |
| O | -1.23629900 | -1.78161200 | 0.84228000  |
| C | -0.55652600 | -1.83536800 | -1.35210800 |
| C | -0.24874600 | -2.41678500 | 0.01891500  |
| H | -0.42510500 | -2.54507700 | -2.16672100 |
| H | 0.02491000  | -0.93499500 | -1.55365000 |
| H | -0.39907900 | -3.49930600 | 0.05757400  |
| H | 0.73843900  | -2.15690000 | 0.39100400  |
| H | -4.24727700 | -0.78483000 | -0.18120800 |
| H | -3.67496900 | -1.11857500 | 1.57289900  |
| B | 2.84751600  | -0.16289500 | 0.09749500  |
| F | 2.30720400  | -0.72588100 | -1.06201100 |
| F | 3.51428000  | -1.06862200 | 0.86431200  |
| F | 3.54423500  | 0.99509300  | -0.17790800 |

**TS-BF-1**

E = -976.500634 a.u.

1 imaginary frequency -436.6772 cm<sup>-1</sup>

|   |             |             |             |
|---|-------------|-------------|-------------|
| C | -2.29930000 | 1.72302300  | -1.23192000 |
| C | -2.67225600 | 1.87662200  | 0.11358600  |
| C | -1.92824500 | 1.67043400  | 1.24614400  |
| C | -0.63870700 | 1.08537100  | 1.40276700  |
| C | -0.89722800 | -0.82445500 | 2.10389200  |
| C | -1.05520200 | -1.48329700 | 0.90267800  |
| C | -1.03571800 | 1.43288800  | -1.69860500 |
| C | 0.15112500  | 1.14192100  | -1.01573700 |
| C | 0.37791800  | 0.95989200  | 0.34710200  |
| H | -3.05973100 | 1.93949900  | -1.97447600 |
| H | -3.67622400 | 2.25756700  | 0.28012600  |
| H | -2.41460600 | 1.92710300  | 2.18281600  |
| H | -0.15564700 | 1.30597700  | 2.34898900  |
| H | 1.03515600  | 1.03688900  | -1.63002900 |
| O | 1.52098700  | 0.60937200  | 0.82429000  |
| H | -0.92459800 | 1.45626600  | -2.78013300 |
| O | -2.20155500 | -1.55924700 | 0.26167100  |
| O | -0.03205900 | -1.89947400 | 0.21085900  |
| C | -1.93799800 | -1.89695100 | -1.11637200 |
| C | -0.45344200 | -2.28354500 | -1.10983600 |
| H | -2.60574100 | -2.70927600 | -1.39551700 |
| H | -2.14621300 | -1.00567500 | -1.71083100 |
| H | -0.27949700 | -3.35405800 | -1.21553700 |
| H | 0.16386000  | -1.72671200 | -1.81042400 |
| H | -1.78437700 | -0.68264300 | 2.70460600  |
| H | 0.04470000  | -0.99488200 | 2.60763000  |

|   |            |             |             |
|---|------------|-------------|-------------|
| B | 2.74236600 | 0.19009700  | -0.04426200 |
| F | 2.29964300 | -0.80637900 | -0.93183700 |
| F | 3.66133400 | -0.28263300 | 0.85224300  |
| F | 3.16418000 | 1.30932700  | -0.74514600 |

**TS-BF-2**

E = -976.514671 a.u.

1 imaginary frequency -421.6612 cm<sup>-1</sup>

|   |             |             |             |
|---|-------------|-------------|-------------|
| C | 3.79310900  | -0.28482800 | -0.38922900 |
| C | 3.67656400  | 0.43303300  | 0.80837300  |
| C | 2.55559200  | 1.09086400  | 1.27343800  |
| C | 2.79555000  | -0.67052700 | -1.24979300 |
| C | 1.27427300  | 1.20604200  | 0.72732200  |
| C | 1.39258500  | -0.54545000 | -1.08951300 |
| C | 0.72902800  | 0.51842400  | -0.35004400 |
| H | 4.80143900  | -0.57328900 | -0.67280800 |
| H | 4.58312800  | 0.54937100  | 1.39246100  |
| H | 2.69877400  | 1.65731800  | 2.18940800  |
| H | 3.10500600  | -1.22379700 | -2.13107800 |
| H | 0.59581500  | 1.88469000  | 1.22700400  |
| H | 0.80700000  | -0.81937600 | -1.95967000 |
| O | -0.49543900 | 0.68551700  | -0.75141600 |
| C | -0.52671300 | -2.06517900 | 0.20342100  |
| C | 0.79903800  | -2.31433700 | -0.07206000 |
| H | 1.48403800  | -2.26342400 | 0.76260100  |
| H | 1.01128000  | -3.01359800 | -0.86815800 |
| O | -1.50659100 | -2.31895100 | -0.63684200 |
| O | -0.90704200 | -1.44283100 | 1.29512800  |
| C | -2.66518500 | -1.55623400 | -0.21950900 |
| C | -2.33432200 | -1.21059500 | 1.23042900  |
| H | -2.50541100 | -0.16486200 | 1.47062300  |
| H | -2.80509300 | -1.87450500 | 1.95682900  |
| H | -2.73212800 | -0.66978000 | -0.84857000 |
| H | -3.53870000 | -2.19381000 | -0.33471000 |
| B | -1.43621700 | 1.82004600  | -0.31593200 |
| F | -2.62363900 | 1.53979500  | -0.97516100 |
| F | -1.61844200 | 1.73003000  | 1.07828800  |
| F | -0.86776400 | 3.01991600  | -0.66937600 |

**TS-BF-3**

E = -976.505453 a.u.

1 imaginary frequency -446.2075 cm<sup>-1</sup>

|   |            |             |             |
|---|------------|-------------|-------------|
| C | 2.23962300 | -1.43354300 | -0.86209100 |
| C | 2.48152400 | -1.85898500 | 0.47618300  |
| C | 1.60470500 | -1.78676300 | 1.52758200  |
| C | 0.28216000 | -1.32792900 | 1.57383900  |
| C | 1.96198600 | 1.27689700  | -0.40850000 |
| C | 2.90406900 | 0.49797300  | -1.05395800 |



|   |             |             |             |
|---|-------------|-------------|-------------|
| C | 0.91476100  | -1.47456700 | -1.45125400 |
| C | -0.28731300 | -1.28575200 | -0.86888300 |
| C | -0.58072700 | -1.01277600 | 0.52522200  |
| H | 3.01323300  | -1.74096800 | -1.55843700 |
| H | 3.48268700  | -2.21806300 | 0.69002400  |
| H | 2.00398000  | -2.10419400 | 2.48717600  |
| H | -0.17581300 | -1.23870300 | 2.55350400  |
| H | -1.16165900 | -1.32201800 | -1.50676900 |
| O | -1.72986700 | -0.51542000 | 0.85980400  |
| H | 0.89915300  | -1.63697000 | -2.52511900 |
| H | 3.85695600  | 0.39282800  | -0.55377100 |
| H | 2.91896800  | 0.59148600  | -2.13215000 |
| O | 2.01775000  | 1.56518100  | 0.87339600  |
| O | 0.87962600  | 1.70685200  | -1.00510600 |
| C | 0.08163600  | 2.45472100  | -0.05130100 |
| H | 0.19762400  | 3.51277900  | -0.29059900 |
| H | -0.94921400 | 2.12976000  | -0.17091200 |
| C | 0.72113000  | 2.06308300  | 1.27658900  |
| H | 0.19465400  | 1.24509200  | 1.77218900  |
| H | 0.87880800  | 2.89262200  | 1.96105300  |
| B | -2.84321600 | -0.08744700 | -0.10683500 |
| F | -3.81564500 | 0.46669400  | 0.68118800  |
| F | -2.27712000 | 0.86669500  | -0.98390800 |
| F | -3.26553300 | -1.19933100 | -0.82142800 |

## 33

E = -976.547209 a.u.

|   |             |             |             |
|---|-------------|-------------|-------------|
| C | 1.52941100  | 0.47869700  | 1.13579900  |
| C | 1.17695300  | 1.93543400  | 0.92776000  |
| C | 0.38103400  | 2.24129500  | -0.08397300 |
| C | -0.10941600 | 1.10665900  | -0.96230600 |
| C | 1.07730600  | 0.19183900  | -1.35849400 |
| C | 2.07165800  | -0.07442500 | -0.22114800 |
| C | 0.35860400  | -0.36035900 | 1.56931700  |
| C | -0.84453900 | -0.41523100 | 0.98252300  |
| C | -1.17326700 | 0.33282500  | -0.22388200 |
| H | 2.32833600  | 0.37441500  | 1.87061500  |
| H | 1.60000000  | 2.68311900  | 1.58643100  |
| H | 0.07533000  | 3.25460700  | -0.31113100 |
| H | -0.58787600 | 1.48831400  | -1.86317000 |
| H | -1.62353100 | -1.04595500 | 1.38700200  |
| O | -2.31197700 | 0.34884500  | -0.71340800 |
| H | 0.51549700  | -0.99414800 | 2.43594400  |
| O | 3.30349300  | 0.53467400  | -0.52711900 |
| O | 2.33089100  | -1.45936100 | -0.06342200 |
| C | 4.32429300  | -0.32084500 | -0.04545100 |
| C | 3.71469100  | -1.69408100 | -0.27567700 |
| H | 5.22893500  | -0.13029400 | -0.62086800 |
| H | 4.52441900  | -0.13845200 | 1.01826900  |
| H | 3.88784300  | -2.04242300 | -1.29971000 |

|   |             |             |             |
|---|-------------|-------------|-------------|
| H | 4.05623300  | -2.45140500 | 0.43041700  |
| H | 1.62494600  | 0.68223400  | -2.16240800 |
| H | 0.71360200  | -0.76681400 | -1.72991200 |
| B | -3.66527400 | -0.40450100 | -0.07352400 |
| F | -3.33379500 | -1.73489300 | -0.08246600 |
| F | -4.63241400 | -0.04071600 | -0.94599500 |
| F | -3.77123400 | 0.12951900  | 1.18301000  |

**34**

E = -976.541275 a.u.

|   |             |             |             |
|---|-------------|-------------|-------------|
| C | 3.79886600  | -0.51555600 | 0.71594200  |
| C | 4.01486200  | 0.35029700  | -0.42320000 |
| C | 3.06270700  | 1.07533600  | -1.05769300 |
| C | 2.67989900  | -1.20647500 | 0.97329000  |
| C | 1.64666500  | 1.10179500  | -0.78365900 |
| C | 1.54667100  | -1.31188800 | -0.01110700 |
| C | 0.98489400  | 0.06749500  | -0.24913600 |
| H | 4.61079800  | -0.57220500 | 1.43619300  |
| H | 5.04773400  | 0.53060200  | -0.70584100 |
| H | 3.40263600  | 1.78307100  | -1.80864600 |
| H | 2.57559500  | -1.73034800 | 1.91942100  |
| H | 1.09367400  | 1.99487400  | -1.04599800 |
| H | 1.91830200  | -1.70630600 | -0.96404800 |
| O | -0.33712000 | 0.11294800  | 0.09506300  |
| C | -0.85954400 | -1.25671100 | 0.06601200  |
| C | 0.33031100  | -2.09624200 | 0.48616800  |
| H | 0.31535600  | -2.15709800 | 1.57572500  |
| H | 0.24664900  | -3.09800500 | 0.06974800  |
| O | -1.28083800 | -1.54814600 | -1.21395800 |
| O | -1.94305500 | -1.32105500 | 0.90082700  |
| C | -2.60838100 | -1.03589100 | -1.30033700 |
| C | -3.13546800 | -1.28952100 | 0.11035400  |
| H | -3.78419900 | -0.49540400 | 0.47445100  |
| H | -3.63309700 | -2.25802700 | 0.20059700  |
| H | -2.58444300 | 0.02931800  | -1.54572100 |
| H | -3.13474400 | -1.58655700 | -2.07711700 |
| B | -1.39665300 | 2.03638800  | 0.40119300  |
| F | -2.50748500 | 1.52887500  | 0.91889200  |
| F | -0.47102900 | 2.53679600  | 1.19763500  |
| F | -1.39612800 | 2.36081000  | -0.88874700 |

**35**

E = -976.548678 a.u.

|   |             |             |             |
|---|-------------|-------------|-------------|
| C | -1.80244400 | -2.08217900 | 0.53867800  |
| C | -1.88307200 | -2.20848100 | -0.97107800 |
| C | -1.39084700 | -1.21328400 | -1.69126400 |
| C | -0.76224600 | -0.05298300 | -0.95858500 |
| C | -1.71417900 | 0.45243800  | 0.19230100  |

|   |             |             |             |
|---|-------------|-------------|-------------|
| C | -2.39089500 | -0.70147700 | 0.92477600  |
| C | -0.38221300 | -2.21961600 | 1.02774200  |
| C | 0.67044200  | -1.48908800 | 0.63598200  |
| C | 0.56154800  | -0.40602000 | -0.33158000 |
| H | -2.40716600 | -2.85489200 | 1.01349600  |
| H | -2.35370400 | -3.07757400 | -1.41421000 |
| H | -1.41981100 | -1.19602300 | -2.77304400 |
| H | -0.56333200 | 0.77693600  | -1.63602900 |
| H | 1.65103300  | -1.66865700 | 1.05323300  |
| O | 1.52475400  | 0.30318400  | -0.65935800 |
| H | -0.20127000 | -2.97990200 | 1.78239900  |
| H | -3.44800800 | -0.68761800 | 0.65985800  |
| H | -2.29741500 | -0.51996600 | 1.99548500  |
| O | -2.68017900 | 1.30879100  | -0.35509500 |
| O | -0.98081800 | 1.23412800  | 1.10007400  |
| C | -0.87769100 | 2.52769300  | 0.52357700  |
| H | -0.87276800 | 3.25444500  | 1.33427800  |
| H | 0.05186100  | 2.62012000  | -0.04723900 |
| C | -2.12710800 | 2.62018500  | -0.37815100 |
| H | -1.87144100 | 2.91262300  | -1.40111100 |
| H | -2.88178000 | 3.30514300  | 0.00952300  |
| B | 3.07850500  | 0.20549600  | -0.04780400 |
| F | 3.70627900  | 1.19927600  | -0.71996200 |
| F | 2.91307400  | 0.41721700  | 1.29454600  |
| F | 3.48103000  | -1.06583400 | -0.36313700 |

## 32

E = -2553.749157 a.u.

|   |             |             |             |
|---|-------------|-------------|-------------|
| C | -1.92008300 | 0.69500200  | 3.34879800  |
| C | -3.53402300 | 2.18058300  | 1.14556900  |
| C | -4.40549700 | 2.24665400  | 2.26005300  |
| C | -4.18659400 | 1.77690400  | 3.52144300  |
| C | -3.04068200 | 1.10083200  | 4.00757000  |
| C | -2.31513900 | 1.58621100  | 1.00817600  |
| C | -1.56930200 | 0.82509800  | 1.96676500  |
| O | -0.49515100 | 0.22791900  | 1.64978300  |
| B | 0.09450400  | -0.04983400 | 0.23036700  |
| C | 0.71268100  | 1.31154500  | -0.43783300 |
| C | 1.32373500  | 1.20209100  | -1.68325600 |
| C | 0.82320100  | 2.55876500  | 0.15737700  |
| C | 1.98006000  | 2.24341200  | -2.31201700 |
| C | 1.47093400  | 3.63353700  | -0.43705800 |
| C | 2.05359400  | 3.47546900  | -1.68009500 |
| C | 1.36599900  | -1.02881600 | 0.53342600  |
| C | 1.67713300  | -2.18794500 | -0.16493900 |
| C | 2.28074500  | -0.66795800 | 1.51720000  |
| C | 2.80045300  | -2.95617500 | 0.10471200  |
| C | 3.41045600  | -1.40939400 | 1.82017200  |

|   |             |             |             |
|---|-------------|-------------|-------------|
| C | 3.67110200  | -2.56716200 | 1.10688600  |
| C | -1.14107100 | -0.76581100 | -0.57600900 |
| C | -1.66337100 | -1.95776300 | -0.08076800 |
| C | -1.78574200 | -0.27454300 | -1.70215700 |
| C | -2.70967800 | -2.64269000 | -0.67256500 |
| C | -2.83891500 | -0.92582400 | -2.32828000 |
| C | -3.29971000 | -2.12354500 | -1.81369700 |
| F | 1.53303000  | 4.81120300  | 0.18186700  |
| F | 2.67613000  | 4.49255300  | -2.26451800 |
| F | 2.53718500  | 2.07841200  | -3.50797600 |
| F | 1.28284500  | 0.03191600  | -2.33129500 |
| F | 0.28530800  | 2.80432600  | 1.36731200  |
| F | 2.10356900  | 0.46061200  | 2.22028300  |
| F | 4.24731300  | -1.01739600 | 2.77973500  |
| F | 4.74979700  | -3.29356500 | 1.37902700  |
| F | 3.04644600  | -4.06388300 | -0.59127200 |
| F | 0.89231300  | -2.63008000 | -1.15446800 |
| F | -1.45080000 | 0.91782300  | -2.22349200 |
| F | -3.42165300 | -0.39597000 | -3.40146500 |
| F | -4.31007400 | -2.75943200 | -2.39409300 |
| F | -3.15664900 | -3.78487600 | -0.15722800 |
| F | -1.14690700 | -2.50237400 | 1.02835500  |
| H | -1.83754700 | 1.70010200  | 0.04375800  |
| H | -3.89565700 | 2.68496500  | 0.25455600  |
| H | -5.34777700 | 2.75534200  | 2.08582200  |
| H | -4.97258500 | 1.94891300  | 4.24927200  |
| H | -3.06783000 | 0.85457700  | 5.06458900  |
| H | -1.16227700 | 0.16764000  | 3.91811300  |

**MC-BPhF**

E = -2860.195151 a.u.

|   |             |             |             |
|---|-------------|-------------|-------------|
| C | -2.01973000 | -0.81708000 | -2.47729700 |
| C | -2.43655300 | -2.89840300 | -0.20944200 |
| C | -5.69438200 | 0.12320100  | -1.42651200 |
| C | -6.60556400 | -0.43284400 | -2.22086900 |
| C | -3.59321800 | -3.07960800 | -0.99996100 |
| C | -3.92284200 | -2.43546000 | -2.15764400 |
| C | -3.19468300 | -1.41844800 | -2.81867300 |
| C | -1.39171600 | -2.02949100 | -0.34758600 |
| C | -1.17985900 | -1.02301000 | -1.34040900 |
| O | -0.18746900 | -0.22356900 | -1.27862100 |
| O | -5.50929100 | -0.20469500 | -0.12794300 |
| O | -4.81040700 | 1.06487500  | -1.82291200 |
| C | -4.34688300 | 0.47267200  | 0.34957600  |
| C | -4.18134400 | 1.60250900  | -0.65776500 |
| H | -4.53617600 | 0.81853000  | 1.36434100  |
| H | -3.49547300 | -0.21526200 | 0.34925800  |
| H | -4.70364300 | 2.51060700  | -0.34747000 |
| H | -3.14704400 | 1.83725300  | -0.89880000 |
| H | -7.25700700 | -1.19986700 | -1.83106300 |

|   |             |             |             |
|---|-------------|-------------|-------------|
| H | -6.73304800 | -0.06386600 | -3.22694100 |
| B | 0.78692000  | 0.03395000  | -0.09478000 |
| C | 1.79631300  | -1.22962800 | 0.16336500  |
| C | 2.71966600  | -1.12651700 | 1.19881800  |
| C | 1.93864200  | -2.35419800 | -0.63562800 |
| C | 3.70114600  | -2.06679400 | 1.45043000  |
| C | 2.90788100  | -3.32478500 | -0.41968200 |
| C | 3.79525400  | -3.18077200 | 0.63020100  |
| C | 1.72934200  | 1.26070100  | -0.61873000 |
| C | 2.07853700  | 2.38405900  | 0.11885300  |
| C | 2.31818100  | 1.17289300  | -1.87592500 |
| C | 2.92901400  | 3.37049200  | -0.35855200 |
| C | 3.16790400  | 2.13765300  | -2.39103200 |
| C | 3.47439800  | 3.24904100  | -1.62413700 |
| C | -0.22209400 | 0.43022300  | 1.14153500  |
| C | -1.02707100 | 1.55798500  | 1.01213000  |
| C | -0.44015800 | -0.30178000 | 2.29948700  |
| C | -1.95058600 | 1.95694600  | 1.96005000  |
| C | -1.36359800 | 0.05427700  | 3.27428800  |
| C | -2.12455300 | 1.19518400  | 3.10376500  |
| F | 2.98633400  | -4.38978500 | -1.21498300 |
| F | 4.72769100  | -4.09957700 | 0.85260100  |
| F | 4.54975600  | -1.91598500 | 2.46286600  |
| F | 2.67344200  | -0.06490700 | 2.01322500  |
| F | 1.11771900  | -2.57564500 | -1.67801100 |
| F | 2.09034800  | 0.10426700  | -2.65244300 |
| F | 3.69641600  | 2.00288700  | -3.60600600 |
| F | 4.28820800  | 4.18632600  | -2.09735000 |
| F | 3.22208500  | 4.43227600  | 0.38887500  |
| F | 1.59748700  | 2.57595600  | 1.35395700  |
| F | 0.20651700  | -1.45779200 | 2.51560100  |
| F | -1.53969300 | -0.70652100 | 4.35039700  |
| F | -3.04022600 | 1.53919700  | 4.00171700  |
| F | -2.71108900 | 3.03558100  | 1.76158100  |
| F | -0.94797700 | 2.31807700  | -0.09073500 |
| H | -0.60962700 | -2.11539200 | 0.39494000  |
| H | -2.36351000 | -3.55891200 | 0.64952500  |
| H | -4.28991500 | -3.83141100 | -0.64575100 |
| H | -4.85820200 | -2.71503500 | -2.62718100 |
| H | -3.65903000 | -1.04378300 | -3.72467500 |
| H | -1.64639700 | -0.03881600 | -3.13400000 |

**TS-BPhF-1**

E = -2860.175239 a.u.

1 imaginary frequency -422.2905 cm<sup>-1</sup>

|   |            |             |             |
|---|------------|-------------|-------------|
| C | 1.94889600 | 0.79746100  | -2.68791400 |
| C | 2.76886600 | 2.73188200  | -0.37252300 |
| C | 3.81834000 | -0.67481500 | -1.44917200 |
| C | 2.89707900 | -1.02431800 | -2.40545000 |
| C | 3.64712600 | 3.10657900  | -1.36808800 |

|   |             |             |             |
|---|-------------|-------------|-------------|
| C | 3.62719300  | 2.68389300  | -2.70862600 |
| C | 2.85049800  | 1.71738400  | -3.29197100 |
| C | 1.69166900  | 1.84053200  | -0.39392600 |
| C | 1.26273400  | 0.99491700  | -1.41255900 |
| O | 0.22351600  | 0.23297400  | -1.31680400 |
| O | 5.02124200  | -0.21506100 | -1.72857000 |
| O | 3.51054700  | -0.59996500 | -0.17457900 |
| C | 5.57331100  | 0.39552300  | -0.54830800 |
| C | 4.61117500  | -0.04380900 | 0.55985200  |
| H | 6.59064100  | 0.03213500  | -0.42323000 |
| H | 5.56220300  | 1.47626800  | -0.70150600 |
| H | 5.00495500  | -0.82266200 | 1.21327500  |
| H | 4.22711300  | 0.78565700  | 1.15245500  |
| H | 3.27961000  | -1.20152900 | -3.40107500 |
| H | 2.04287200  | -1.60137200 | -2.07508600 |
| B | -0.65035200 | -0.06391200 | -0.08993400 |
| C | -1.41675800 | 1.26311700  | 0.50076600  |
| C | -2.12998300 | 1.14950000  | 1.68960100  |
| C | -1.56454000 | 2.47932300  | -0.15274100 |
| C | -2.90552900 | 2.16236300  | 2.22344300  |
| C | -2.33144300 | 3.52344400  | 0.34792500  |
| C | -3.00556200 | 3.36590500  | 1.54403000  |
| C | -1.85123500 | -1.02967300 | -0.64929900 |
| C | -2.35421900 | -2.14426600 | 0.01025800  |
| C | -2.51222900 | -0.69827500 | -1.82758300 |
| C | -3.41594100 | -2.89778800 | -0.46837800 |
| C | -3.57196600 | -1.42787300 | -2.34224600 |
| C | -4.02787600 | -2.53982100 | -1.65599700 |
| C | 0.40104100  | -0.82009500 | 0.93040000  |
| C | 0.91709900  | -2.05994800 | 0.56870700  |
| C | 0.96744000  | -0.27866100 | 2.07401400  |
| C | 1.88955100  | -2.73491900 | 1.28260100  |
| C | 1.96418200  | -0.90528800 | 2.80932800  |
| C | 2.42344900  | -2.14731000 | 2.41548500  |
| F | -2.42253800 | 4.67446300  | -0.31765300 |
| F | -3.74343500 | 4.35598900  | 2.03649600  |
| F | -3.55466100 | 1.99421300  | 3.37345500  |
| F | -2.08336500 | 0.00182900  | 2.37822800  |
| F | -0.95502200 | 2.72198600  | -1.32299600 |
| F | -2.15191400 | 0.38790100  | -2.52524700 |
| F | -4.15981300 | -1.06443200 | -3.48219800 |
| F | -5.04491200 | -3.25273800 | -2.13107000 |
| F | -3.84750800 | -3.96468400 | 0.20256500  |
| F | -1.81870000 | -2.56435800 | 1.16382300  |
| F | 0.61396700  | 0.94179800  | 2.51409500  |
| F | 2.50820500  | -0.30342600 | 3.86927200  |
| F | 3.40711400  | -2.74566600 | 3.08704700  |
| F | 2.35828500  | -3.90867400 | 0.86073900  |
| F | 0.51127000  | -2.65738500 | -0.56476300 |
| H | 1.08604400  | 1.83371100  | 0.50147200  |
| H | 2.89647000  | 3.24541500  | 0.57717100  |
| H | 4.36802700  | 3.87710000  | -1.11493600 |

|   |            |            |             |
|---|------------|------------|-------------|
| H | 4.29845200 | 3.21381100 | -3.37835600 |
| H | 2.97575200 | 1.58542600 | -4.36193200 |
| H | 1.29022700 | 0.29087300 | -3.38487900 |

**TS-BPhF-2**

E = -2860.1706481 a.u.

1 imaginary frequency -432.4066 cm<sup>-1</sup>

|   |             |             |             |
|---|-------------|-------------|-------------|
| C | -0.82120200 | -2.72036600 | -0.75925800 |
| O | 0.07873200  | -0.59008600 | -1.10950600 |
| C | 1.69765400  | -2.89211700 | -1.94527200 |
| C | 0.77388200  | -3.83960800 | -1.55826300 |
| C | -2.80590500 | -3.89277000 | -1.75881000 |
| C | -2.84268100 | -3.33097300 | -3.05168400 |
| C | -2.19922400 | -2.19571100 | -3.48037000 |
| C | -1.94363800 | -3.60205600 | -0.74036400 |
| C | -1.35388000 | -1.32281200 | -2.77468100 |
| C | -0.76572300 | -1.50229000 | -1.54147200 |
| H | -3.54644300 | -4.66074100 | -1.55575000 |
| H | -3.51811100 | -3.80095200 | -3.75866500 |
| H | -2.42778800 | -1.88146400 | -4.49449700 |
| H | -2.06794700 | -4.16185600 | 0.18117600  |
| H | -1.09984100 | -0.38580800 | -3.25506400 |
| H | -0.32861300 | -2.60481300 | 0.19451200  |
| H | 0.18916100  | -4.26978700 | -2.35989200 |
| H | 1.04087300  | -4.46897000 | -0.72091400 |
| O | 2.70673300  | -2.48667500 | -1.20428000 |
| O | 1.57362300  | -2.22992600 | -3.07469500 |
| C | 3.38491100  | -1.41184700 | -1.88500700 |
| C | 2.42214100  | -1.05948000 | -3.01493700 |
| H | 1.78576100  | -0.20838000 | -2.77761100 |
| H | 2.89938800  | -0.94452600 | -3.98502900 |
| H | 3.52697800  | -0.59997100 | -1.17562000 |
| H | 4.34745500  | -1.79140400 | -2.22969300 |
| B | 0.02698400  | 0.35246400  | 0.10698300  |
| C | -1.14741400 | -0.15578200 | 1.14893600  |
| C | -2.45888900 | -0.24997800 | 0.69234000  |
| C | -0.98646500 | -0.46753400 | 2.49452300  |
| C | -3.52018200 | -0.69969600 | 1.46050600  |
| C | -2.02062000 | -0.91605200 | 3.30310900  |
| C | -3.29598300 | -1.04351000 | 2.78130600  |
| C | -0.38681200 | 1.85215900  | -0.42250500 |
| C | -0.33477900 | 2.28762500  | -1.73772800 |
| C | -0.82952300 | 2.80869300  | 0.48399600  |
| C | -0.73602900 | 3.55124900  | -2.14456200 |
| C | -1.23614600 | 4.08256800  | 0.12600400  |
| C | -1.19715900 | 4.45607700  | -1.20656700 |
| C | 1.56578400  | 0.29532600  | 0.69534800  |
| C | 2.47905200  | 1.34447000  | 0.66132900  |
| C | 2.08514000  | -0.89118400 | 1.20408300  |
| C | 3.79532600  | 1.23000500  | 1.09811100  |

|   |             |             |             |
|---|-------------|-------------|-------------|
| C | 3.38332800  | -1.05294800 | 1.64969500  |
| C | 4.25266400  | 0.02422500  | 1.59586800  |
| F | -2.76044700 | 0.11151600  | -0.56610300 |
| F | -4.74439000 | -0.79453700 | 0.94463600  |
| F | -4.29452900 | -1.47739300 | 3.54294300  |
| F | -1.79979400 | -1.21380100 | 4.58165100  |
| F | 0.19441800  | -0.32137200 | 3.10481100  |
| F | -0.84372800 | 2.53039300  | 1.79637800  |
| F | -1.65321600 | 4.94997400  | 1.04522000  |
| F | -1.58305200 | 5.67286700  | -1.57740800 |
| F | -0.67052500 | 3.90186600  | -3.42958900 |
| F | 0.14694500  | 1.50270400  | -2.72691200 |
| F | 1.31064300  | -1.98736900 | 1.29156400  |
| F | 3.80551800  | -2.22630600 | 2.11478700  |
| F | 5.50731900  | -0.10194800 | 2.01328100  |
| F | 4.61878500  | 2.27424100  | 1.03833300  |
| F | 2.14891400  | 2.55202500  | 0.18951400  |

## 36

E = -2860.21737 a.u.

|   |             |             |             |
|---|-------------|-------------|-------------|
| C | 1.96449300  | 0.47292500  | -2.66568600 |
| C | 2.78211400  | 2.26613200  | -0.43428100 |
| C | 4.13872000  | 0.33724700  | -1.28625200 |
| C | 3.11040200  | -0.43501900 | -2.12382600 |
| C | 3.90678300  | 1.88124300  | -1.35355700 |
| C | 3.57202500  | 2.29580200  | -2.77119800 |
| C | 2.60079900  | 1.63801100  | -3.38513600 |
| C | 1.52098400  | 1.81439400  | -0.50837500 |
| C | 1.10549600  | 0.83348900  | -1.48568500 |
| O | 0.06581400  | 0.15362400  | -1.36434100 |
| O | 5.42916300  | 0.01911400  | -1.75358700 |
| O | 4.09857000  | -0.02129500 | 0.08385600  |
| C | 6.24948400  | -0.25007300 | -0.62542600 |
| C | 5.24525000  | -0.81328500 | 0.36231800  |
| H | 7.02532800  | -0.95136100 | -0.92875200 |
| H | 6.71088100  | 0.67070800  | -0.24758400 |
| H | 5.03826300  | -1.87201700 | 0.17347400  |
| H | 5.50968700  | -0.67335200 | 1.40942500  |
| H | 3.62472500  | -0.84776100 | -2.99039200 |
| H | 2.70794300  | -1.25992500 | -1.53516100 |
| B | -0.81886700 | -0.06972400 | -0.05086400 |
| C | -1.71068500 | 1.25196900  | 0.28506200  |
| C | -2.53749000 | 1.20072500  | 1.40242800  |
| C | -1.84684500 | 2.39045900  | -0.49479300 |
| C | -3.42055700 | 2.20564200  | 1.74968000  |
| C | -2.71942900 | 3.42461600  | -0.18315600 |
| C | -3.51078900 | 3.33232600  | 0.94644100  |
| C | -1.85057800 | -1.24633700 | -0.49434500 |
| C | -2.16052000 | -2.36457300 | 0.26802100  |
| C | -2.55752900 | -1.12350500 | -1.68525900 |



|   |             |             |             |
|---|-------------|-------------|-------------|
| C | -3.09023000 | -3.31453700 | -0.12873900 |
| C | -3.48860000 | -2.05193600 | -2.11938500 |
| C | -3.75543400 | -3.15961400 | -1.33217200 |
| C | 0.31899500  | -0.50891000 | 1.03852800  |
| C | 1.09780000  | -1.63172700 | 0.77546100  |
| C | 0.70848000  | 0.21572500  | 2.15534400  |
| C | 2.17583500  | -2.01810500 | 1.54644500  |
| C | 1.78458800  | -0.13631100 | 2.95823500  |
| C | 2.52389600  | -1.26162200 | 2.65023100  |
| F | -2.79834500 | 4.49994600  | -0.96394500 |
| F | -4.35005000 | 4.31227700  | 1.25988300  |
| F | -4.17919100 | 2.10454600  | 2.83676300  |
| F | -2.48922800 | 0.12814100  | 2.20119300  |
| F | -1.11783200 | 2.56033000  | -1.61228200 |
| F | -2.36304700 | -0.05560400 | -2.47251300 |
| F | -4.13051200 | -1.88715800 | -3.27439600 |
| F | -4.64596200 | -4.06256700 | -1.72710100 |
| F | -3.34582700 | -4.37334400 | 0.63606100  |
| F | -1.56384600 | -2.58204500 | 1.44512200  |
| F | 0.09651500  | 1.36402300  | 2.48073900  |
| F | 2.13119800  | 0.62122100  | 3.99622600  |
| F | 3.59073400  | -1.58843400 | 3.37471800  |
| F | 2.91618200  | -3.07338600 | 1.20409300  |
| F | 0.85172100  | -2.37956000 | -0.31284200 |
| H | 0.79141600  | 2.13555800  | 0.22208400  |
| H | 3.01845300  | 2.95046400  | 0.37423300  |
| H | 4.82807600  | 2.35196900  | -1.01110600 |
| H | 4.10930400  | 3.11616800  | -3.22928600 |
| H | 2.28022500  | 1.86919600  | -4.39308300 |
| H | 1.33430400  | -0.11894900 | -3.32794700 |

## 37

E = -2860.20005 a.u.

|   |             |             |             |
|---|-------------|-------------|-------------|
| C | 2.98716100  | -2.01896300 | -1.41689100 |
| O | 1.66674500  | -0.05362100 | -1.47846200 |
| C | 3.01964900  | 0.38947600  | -1.29352400 |
| C | 3.79424100  | -0.84551800 | -0.85844500 |
| C | 2.87865900  | -3.64895600 | -3.29267500 |
| C | 1.58161300  | -4.17972500 | -2.92288400 |
| C | 0.54935300  | -3.45352800 | -2.42959300 |
| C | 3.49980400  | -2.62002000 | -2.69936400 |
| C | 0.55632100  | -2.04370400 | -2.11993100 |
| C | 1.65320300  | -1.38983600 | -1.71331100 |
| H | 3.35733400  | -4.11049800 | -4.15242900 |
| H | 1.38151000  | -5.21160600 | -3.19560500 |
| H | -0.41412500 | -3.95080600 | -2.34729200 |
| H | 4.40917800  | -2.20878500 | -3.12765500 |
| H | -0.36287600 | -1.48538000 | -2.23968700 |
| H | 4.81578800  | -0.79349200 | -1.23193300 |
| H | 3.82195900  | -0.86681300 | 0.22920500  |

|   |             |             |             |
|---|-------------|-------------|-------------|
| O | 3.00926900  | 1.42128400  | -0.36738700 |
| O | 3.50002300  | 0.91290800  | -2.48134500 |
| C | 3.10683500  | 2.66601700  | -1.06096400 |
| C | 3.01531000  | 2.25012100  | -2.52746500 |
| H | 1.98326600  | 2.26708200  | -2.88783900 |
| H | 3.65733200  | 2.82330600  | -3.19312500 |
| H | 2.29229300  | 3.31911600  | -0.74892500 |
| H | 4.06877000  | 3.12489300  | -0.81847800 |
| B | -1.02888700 | 0.35427300  | 0.80841900  |
| C | 0.30391000  | 0.76283600  | 1.51651900  |
| C | 1.33557000  | -0.14603400 | 1.76587600  |
| C | 0.54718600  | 2.06940200  | 1.94382400  |
| C | 2.50717900  | 0.20170600  | 2.40629300  |
| C | 1.71892900  | 2.45493300  | 2.56986400  |
| C | 2.70654400  | 1.51340200  | 2.79968500  |
| C | -1.57628400 | -1.11353400 | 0.91579900  |
| C | -2.18386100 | -1.75047700 | -0.16478800 |
| C | -1.45651800 | -1.87637500 | 2.07654200  |
| C | -2.57469200 | -3.07658900 | -0.13260700 |
| C | -1.86717600 | -3.19405100 | 2.15646100  |
| C | -2.41594000 | -3.80137000 | 1.03707000  |
| C | -1.85822000 | 1.40018700  | -0.02155900 |
| C | -3.24839400 | 1.45059200  | 0.05662200  |
| C | -1.26673900 | 2.30526900  | -0.89787200 |
| C | -4.01091600 | 2.33457500  | -0.68638500 |
| C | -1.99706300 | 3.18728800  | -1.67284100 |
| C | -3.37861300 | 3.20294800  | -1.56283100 |
| F | 3.46736800  | -0.69915400 | 2.60168800  |
| F | 3.83737000  | 1.86603500  | 3.38510200  |
| F | 1.90349100  | 3.71572900  | 2.94720000  |
| F | -0.37432700 | 3.02059700  | 1.78340700  |
| F | -0.93647400 | -1.33889300 | 3.18071500  |
| F | -1.73591600 | -3.88180400 | 3.28387200  |
| F | -2.79410900 | -5.06703700 | 1.08873400  |
| F | -3.09296200 | -3.65817100 | -1.20874800 |
| F | -2.38540700 | -1.09921700 | -1.31374500 |
| F | 0.05877500  | 2.34616000  | -1.03175300 |
| F | -1.38668500 | 4.01987400  | -2.50978500 |
| F | -4.09166900 | 4.04857700  | -2.28790600 |
| F | -5.33299500 | 2.35731800  | -0.57120900 |
| F | -3.90253300 | 0.63832000  | 0.88905600  |
| F | 1.24490500  | -1.41179600 | 1.35658100  |
| H | 2.85392200  | -2.81221700 | -0.67342500 |

$\omega$ B97X-D/6-311G(d,p) gas phase computed total energies, unique imaginary frequency, and Cartesian coordinates of the stationary points involved in the non-catalyzed and LA catalyzed cycloaddition reactions of tropone **11** with ketene diethyl acetal **24**.

**24**

E = -386.258366752 a.u.

|   |             |             |             |
|---|-------------|-------------|-------------|
| C | 0.33758300  | 2.13629200  | 0.13445500  |
| C | -0.01349000 | 0.86693000  | -0.08438400 |
| H | -0.44191900 | 2.87941400  | 0.20613100  |
| H | 1.36807700  | 2.44790700  | 0.20013900  |
| O | -1.29883200 | 0.52695400  | -0.28469500 |
| O | 0.80421800  | -0.20063500 | -0.16930200 |
| C | 2.18879100  | 0.00635400  | 0.06654800  |
| H | 2.32217000  | 0.47408300  | 1.04928100  |
| C | -1.73689500 | -0.73693200 | 0.22043100  |
| H | -1.48537400 | -0.81016100 | 1.28501700  |
| H | -1.22643000 | -1.54601400 | -0.30718600 |
| H | 2.58771700  | 0.68991900  | -0.69216300 |
| C | 2.87457100  | -1.33957000 | -0.00007000 |
| H | 3.94693100  | -1.22119000 | 0.17158100  |
| H | 2.47392200  | -2.01308900 | 0.76020900  |
| H | 2.72870900  | -1.79654300 | -0.98080000 |
| C | -3.23249300 | -0.80599800 | 0.00894100  |
| H | -3.61825700 | -1.76192700 | 0.37156500  |
| H | -3.73602100 | 0.00052900  | 0.54550400  |
| H | -3.47102600 | -0.71594000 | -1.05282400 |

**MC-exp**

E = -731.771014964 a.u.

|   |             |             |             |
|---|-------------|-------------|-------------|
| C | 3.14391600  | -0.25622900 | -0.18218300 |
| C | 2.65089400  | 0.33286900  | 0.93221300  |
| C | 1.44887800  | 0.01360100  | 1.64359500  |
| C | 0.53211300  | -0.95049500 | 1.41224700  |
| C | -2.09555600 | 1.49538000  | 1.67806300  |
| C | -1.49980900 | 1.31110900  | 0.49430100  |
| C | 2.58274000  | -1.34674300 | -0.92447600 |
| C | 1.45466200  | -2.05898900 | -0.70850800 |
| C | 0.44220000  | -1.95769900 | 0.35050100  |
| H | 4.07503000  | 0.14067200  | -0.57452100 |
| H | 3.22568700  | 1.15689700  | 1.34359900  |
| H | 1.24152800  | 0.65590700  | 2.49417400  |
| H | -0.31363100 | -0.99979300 | 2.09060100  |
| H | 1.22069200  | -2.85392000 | -1.41057300 |
| O | -0.51001700 | -2.72865700 | 0.33675800  |

|   |             |             |             |
|---|-------------|-------------|-------------|
| H | 3.16050300  | -1.63969600 | -1.79717200 |
| O | -0.48026900 | 2.10257200  | 0.11189100  |
| O | -1.78595000 | 0.37608000  | -0.42290100 |
| C | 0.15705000  | 1.85583200  | -1.14252300 |
| C | -2.85052900 | -0.53341400 | -0.14763600 |
| H | 0.56923100  | 0.84299100  | -1.15819500 |
| H | -2.59382800 | -1.12169000 | 0.73885900  |
| H | -1.75600200 | 2.30403800  | 2.30750600  |
| H | -2.91405500 | 0.87631700  | 2.00766000  |
| H | -0.57297100 | 1.93428300  | -1.95279700 |
| H | -3.76250000 | 0.04027900  | 0.05272100  |
| C | 1.24907400  | 2.89069100  | -1.28979200 |
| H | 1.77715600  | 2.74203600  | -2.23509000 |
| H | 0.83034500  | 3.89907600  | -1.27883900 |
| H | 1.96976500  | 2.80485300  | -0.47400800 |
| C | -3.01146700 | -1.42971500 | -1.35258000 |
| H | -2.10888400 | -2.02294800 | -1.50279200 |
| H | -3.84510900 | -2.11639100 | -1.18778200 |
| H | -3.21806900 | -0.84006100 | -2.24866500 |

**TS-11-exp**

E = -731.734166690 a.u.

1 imaginary frequency -429.4510 cm<sup>-1</sup>

|   |             |             |             |
|---|-------------|-------------|-------------|
| C | 0.39772700  | -0.67326500 | 2.25981300  |
| C | -0.35956700 | -1.66187200 | 1.63465900  |
| C | -0.21946700 | -2.20018200 | 0.36962800  |
| C | 0.58478500  | -1.73589200 | -0.71730600 |
| C | -0.30447600 | -0.51474900 | -1.89005900 |
| C | -0.64140100 | 0.57680000  | -1.08699200 |
| C | 1.61249700  | -0.15048700 | 1.79760100  |
| C | 2.30320100  | -0.35982800 | 0.62573600  |
| C | 1.93419100  | -1.07090100 | -0.56801400 |
| H | 0.08870000  | -0.37355000 | 3.25572300  |
| H | -1.14968000 | -2.10083100 | 2.24196500  |
| H | -0.87606800 | -3.03328300 | 0.12966000  |
| H | 0.67887600  | -2.47077700 | -1.51414200 |
| H | 3.28110200  | 0.10318200  | 0.53384700  |
| O | 2.68424300  | -1.13321300 | -1.54058000 |
| H | 2.11300900  | 0.51495100  | 2.49990300  |
| O | -1.74161200 | 0.70117300  | -0.38259800 |
| O | 0.25823800  | 1.49210100  | -0.87146600 |
| C | -2.83728800 | -0.21917500 | -0.57131900 |
| C | 0.10722800  | 2.39912700  | 0.24458700  |
| H | -3.26189400 | -0.03882000 | -1.56413000 |
| H | -0.79193300 | 2.99836200  | 0.08752000  |
| H | -1.12307600 | -1.09595300 | -2.29424600 |
| H | 0.52097400  | -0.33905200 | -2.57012900 |
| H | -2.45841400 | -1.23812400 | -0.51308500 |
| H | -0.01737700 | 1.79417900  | 1.14807400  |

|   |             |             |             |
|---|-------------|-------------|-------------|
| C | 1.35776600  | 3.24049800  | 0.29593100  |
| H | 1.48320100  | 3.81364100  | -0.62453200 |
| H | 1.29004900  | 3.93855400  | 1.13351200  |
| H | 2.23189500  | 2.60334200  | 0.43674900  |
| C | -3.83076700 | 0.05310900  | 0.53095900  |
| H | -4.18596500 | 1.08445400  | 0.49224900  |
| H | -4.68843500 | -0.61431500 | 0.42347800  |
| H | -3.36850000 | -0.12553700 | 1.50339200  |

**IN-1-exp**

E = -731.739458 a.u.

|   |             |             |             |
|---|-------------|-------------|-------------|
| C | -0.16762400 | -0.65021700 | 1.86178200  |
| C | -0.30517700 | -1.95379700 | 1.30306300  |
| C | 0.32949000  | -2.42625800 | 0.20426300  |
| C | 1.06888000  | -1.57858400 | -0.76792100 |
| C | 0.12972300  | -0.64031400 | -1.65496000 |
| C | -0.56322100 | 0.46084300  | -0.97532700 |
| C | 0.98594000  | 0.13069300  | 1.76944700  |
| C | 2.10402700  | 0.01378500  | 0.96131800  |
| C | 2.26198800  | -0.76809400 | -0.22709900 |
| H | -0.87032300 | -0.37702900 | 2.64419500  |
| H | -0.95916600 | -2.64101900 | 1.83930100  |
| H | 0.23559900  | -3.47861600 | -0.04491400 |
| H | 1.52346100  | -2.21769200 | -1.52641800 |
| H | 2.94935500  | 0.66363600  | 1.16519900  |
| O | 3.28868400  | -0.78195700 | -0.90288500 |
| H | 1.02736500  | 0.95549800  | 2.48300900  |
| O | -1.82737700 | 0.52917400  | -0.70311400 |
| O | 0.11597700  | 1.53413900  | -0.79480500 |
| H | -0.58802100 | -1.26806700 | -2.18220200 |
| H | 0.80399600  | -0.17508200 | -2.37764300 |
| C | -0.39791500 | 2.58120900  | 0.07099600  |
| H | -0.73503300 | 2.09123200  | 0.98793100  |
| H | -1.24925600 | 3.04749700  | -0.42790100 |
| C | 0.73998600  | 3.53885100  | 0.31556900  |
| H | 1.08081500  | 3.99022900  | -0.61769000 |
| H | 0.40366800  | 4.33427100  | 0.98424500  |
| H | 1.57572900  | 3.01284600  | 0.77855600  |
| C | -2.66901600 | -0.65936200 | -0.69139900 |
| H | -3.14512300 | -0.71185800 | -1.67308200 |
| H | -2.04173300 | -1.53201600 | -0.52066500 |
| C | -3.66530100 | -0.48199000 | 0.42651000  |
| H | -4.32992300 | -1.34814600 | 0.45642700  |
| H | -3.14063600 | -0.41221100 | 1.38058400  |
| H | -4.26974700 | 0.41508500  | 0.28004600  |

**TS-12-exp**

E = -731.738615460 a.u.

1 imaginary frequency -201.0834 cm<sup>-1</sup>

|   |             |             |             |
|---|-------------|-------------|-------------|
| C | -0.26023700 | -1.04989800 | 1.51674900  |
| C | -0.08892900 | -2.29777500 | 0.83146000  |
| C | 0.75308900  | -2.48055600 | -0.20101300 |
| C | 1.37781900  | -1.33188500 | -0.91133500 |
| C | 0.27963800  | -0.39768200 | -1.56513600 |
| C | -0.72790600 | 0.27838600  | -0.71655600 |
| C | 0.78547400  | -0.15406600 | 1.78333000  |
| C | 2.01684000  | -0.01104300 | 1.17831200  |
| C | 2.39884700  | -0.51589500 | -0.10809000 |
| H | -1.10904300 | -0.98832500 | 2.19281500  |
| H | -0.66876000 | -3.14441900 | 1.19233000  |
| H | 0.90427700  | -3.47057800 | -0.61689400 |
| H | 1.94639900  | -1.68864100 | -1.77140500 |
| H | 2.72971600  | 0.68286900  | 1.61305800  |
| O | 3.46234200  | -0.23267600 | -0.65656000 |
| H | 0.59213100  | 0.53433500  | 2.60675500  |
| O | -1.93772000 | -0.20764900 | -0.76873300 |
| O | -0.64417200 | 1.51462300  | -0.31190400 |
| H | -0.28795000 | -1.02607100 | -2.24997900 |
| H | 0.81115300  | 0.35862900  | -2.14729500 |
| C | 0.53088900  | 2.34524600  | -0.53908900 |
| H | 0.37324500  | 2.83221600  | -1.50573100 |
| H | 1.42518600  | 1.72909600  | -0.57068600 |
| C | -2.95455200 | 0.37330500  | 0.07134200  |
| H | -3.18418700 | 1.37463500  | -0.29841600 |
| H | -2.53713900 | 0.45483700  | 1.07856800  |
| C | -4.14797800 | -0.54887300 | 0.02474700  |
| H | -3.87882700 | -1.53867300 | 0.39713600  |
| H | -4.94561800 | -0.14474200 | 0.65177900  |
| H | -4.52584600 | -0.64834700 | -0.99444800 |
| C | 0.60483500  | 3.34250800  | 0.58849000  |
| H | 1.44209400  | 4.02047100  | 0.40966500  |
| H | -0.31184700 | 3.93133100  | 0.65699700  |
| H | 0.77445600  | 2.82636400  | 1.53406800  |

### TS-2-exp

E = -731.736726155 a.u.

1 imaginary frequency -479.7894 cm<sup>-1</sup>

|   |             |             |             |
|---|-------------|-------------|-------------|
| C | -0.95021900 | -1.42531300 | 0.28738300  |
| C | -0.80109800 | -0.19036100 | 1.11354500  |
| O | 0.27279600  | -0.08138300 | 1.73337100  |
| C | 0.10994600  | -0.95787600 | -1.30166800 |
| C | -3.33844800 | -1.32134600 | -0.51473700 |
| C | 1.07713800  | -0.02152700 | -0.92217600 |
| C | -3.65444200 | 0.02836900  | -0.36262900 |
| C | -2.94548300 | 0.96737800  | 0.38399500  |

|   |             |             |             |
|---|-------------|-------------|-------------|
| C | -2.18509900 | -1.98327100 | -0.14997200 |
| C | -1.75993400 | 0.85957400  | 1.08893000  |
| H | -4.11155500 | -1.93832700 | -0.96741200 |
| H | -4.59674500 | 0.36006600  | -0.78572900 |
| H | -3.42354000 | 1.94209300  | 0.45857100  |
| H | -2.16688600 | -3.05371300 | -0.33521400 |
| H | -1.45537100 | 1.71718600  | 1.68171400  |
| H | -0.25918100 | -2.17367100 | 0.66308100  |
| H | -0.68817100 | -0.52502700 | -1.89125900 |
| H | 0.45767800  | -1.93026300 | -1.62662900 |
| O | 2.29255000  | -0.26057500 | -0.48271100 |
| O | 0.74360600  | 1.24102700  | -0.96148600 |
| C | 2.60648400  | -1.55434900 | 0.06382000  |
| C | 1.47947800  | 2.19103100  | -0.14833500 |
| H | 1.50822200  | 1.78992900  | 0.86620300  |
| H | 2.43909300  | -2.32116500 | -0.69858900 |
| H | 1.93363800  | -1.70563200 | 0.90979500  |
| H | 2.49410500  | 2.27601500  | -0.54206800 |
| C | 4.05209400  | -1.51838200 | 0.49647100  |
| H | 4.32708400  | -2.48343900 | 0.92759100  |
| H | 4.71028600  | -1.31684300 | -0.35107900 |
| H | 4.20322100  | -0.74704300 | 1.25326000  |
| C | 0.72967700  | 3.49830000  | -0.22683000 |
| H | -0.28580300 | 3.37495100  | 0.15241100  |
| H | 1.24247900  | 4.24769800  | 0.38056200  |
| H | 0.67925500  | 3.86126700  | -1.25538700 |

**TS-3-exp**

E = -731.731742134 a.u.

1 imaginary frequency -460.9115 cm<sup>-1</sup>

|   |             |             |             |
|---|-------------|-------------|-------------|
| C | 0.28648800  | 1.99512400  | -1.23052100 |
| C | 1.56719000  | 1.99184000  | -0.59792700 |
| C | 1.83486500  | 1.49381100  | 0.66602800  |
| C | 0.98713700  | 0.90213300  | 1.59299000  |
| C | 0.04050200  | -0.75215200 | -1.19315600 |
| C | -0.06935200 | 0.32299000  | -2.09373800 |
| C | -0.90087200 | 2.31623700  | -0.41891900 |
| C | -1.20392700 | 1.82530300  | 0.78952500  |
| C | -0.44490100 | 0.83871000  | 1.59459100  |
| H | 0.28757000  | 2.55653900  | -2.16237100 |
| H | 2.41053100  | 2.31838300  | -1.19668200 |
| H | 2.88576800  | 1.50746900  | 0.94994900  |
| H | 1.44053600  | 0.42684700  | 2.45839400  |
| H | -2.14496900 | 2.11351400  | 1.25047200  |
| O | -1.07638100 | 0.05850500  | 2.31947500  |
| H | -1.61049100 | 2.99809700  | -0.88260400 |
| H | 0.74879500  | 0.34635400  | -2.80325600 |
| H | -1.04559700 | 0.46778300  | -2.54271600 |
| O | 1.23839300  | -1.20714900 | -0.94011800 |

|   |             |             |             |
|---|-------------|-------------|-------------|
| O | -0.92420400 | -1.35599400 | -0.54891100 |
| C | 1.43648900  | -2.02933400 | 0.23441700  |
| H | 0.98248600  | -3.00578500 | 0.05408100  |
| H | 0.92527600  | -1.54616700 | 1.07148600  |
| C | -2.30784500 | -1.00213000 | -0.76940700 |
| H | -2.58835200 | -1.37476100 | -1.76004200 |
| H | -2.40110500 | 0.08298800  | -0.74494600 |
| C | 2.92482000  | -2.11575900 | 0.45990000  |
| H | 3.33534900  | -1.12019000 | 0.63694900  |
| H | 3.12245300  | -2.73538900 | 1.33736200  |
| H | 3.43022600  | -2.55932200 | -0.40030300 |
| C | -3.10892300 | -1.63457800 | 0.34176900  |
| H | -4.16717500 | -1.40286500 | 0.19884500  |
| H | -2.98862600 | -2.71984700 | 0.33954100  |
| H | -2.77517700 | -1.22971500 | 1.29896200  |

**28-exp**

E = -731.802069371 a.u.

|   |             |             |             |
|---|-------------|-------------|-------------|
| C | 0.37075700  | 0.05872400  | 1.29839200  |
| C | 1.11397300  | -1.23043500 | 1.58184600  |
| C | 1.87416300  | -1.73063800 | 0.61949900  |
| C | 1.93428500  | -0.98581900 | -0.69395500 |
| C | 0.50275000  | -0.61947400 | -1.15935900 |
| C | -0.42420000 | -0.13064900 | -0.02856500 |
| C | 1.30188000  | 1.24215400  | 1.19103000  |
| C | 2.36115500  | 1.32646000  | 0.38438200  |
| C | 2.79656700  | 0.26994900  | -0.56145400 |
| H | -0.36177600 | 0.24455000  | 2.08416400  |
| H | 0.99698200  | -1.70877500 | 2.54623000  |
| H | 2.44439300  | -2.64365900 | 0.74206100  |
| H | 2.41785600  | -1.58642600 | -1.46448200 |
| H | 2.98440000  | 2.21443200  | 0.38083000  |
| O | 3.79757500  | 0.41368000  | -1.22629100 |
| H | 1.07503000  | 2.09457700  | 1.82574500  |
| O | -1.42655800 | -1.05472300 | 0.32409800  |
| O | -0.99639700 | 1.06549400  | -0.49616900 |
| C | -2.31409700 | -1.46311900 | -0.70688000 |
| C | -1.87569900 | 1.74287900  | 0.38892700  |
| H | -2.44785900 | -0.65123800 | -1.42919200 |
| H | -2.50239500 | 1.01993300  | 0.92136300  |
| H | 0.06945100  | -1.51052100 | -1.61342700 |
| H | 0.54102700  | 0.15316600  | -1.92802900 |
| H | -1.29490400 | 2.30395300  | 1.13370400  |
| H | -1.89567200 | -2.32788100 | -1.23726700 |
| C | -3.63606300 | -1.83415600 | -0.06745600 |
| H | -4.33039000 | -2.21298800 | -0.82164700 |
| H | -3.48882400 | -2.60837300 | 0.68845900  |
| H | -4.08897500 | -0.96467600 | 0.41475000  |
| C | -2.72315400 | 2.68870200  | -0.43458600 |



|   |             |            |             |
|---|-------------|------------|-------------|
| H | -3.38962200 | 3.26407400 | 0.21272300  |
| H | -2.08928600 | 3.38464000 | -0.98787200 |
| H | -3.33029800 | 2.13213500 | -1.15214400 |

**29-exp**

E = -731.800801942 a.u.

|   |             |             |             |
|---|-------------|-------------|-------------|
| C | 3.75562200  | -0.00827200 | 0.94616900  |
| C | 4.11042400  | -0.27827100 | -0.43079600 |
| C | 3.32603600  | -0.04390000 | -1.50967300 |
| C | 2.52136600  | -0.04144100 | 1.46690900  |
| C | 1.97003900  | 0.44535600  | -1.52720300 |
| C | 1.31922200  | -0.55769800 | 0.72269000  |
| C | 1.10065800  | 0.27170600  | -0.52072400 |
| H | 4.57291300  | 0.28580600  | 1.60007100  |
| H | 5.13925400  | -0.57168500 | -0.61697100 |
| H | 3.78536500  | -0.17133600 | -2.48636000 |
| H | 2.36504700  | 0.29782100  | 2.48736300  |
| H | 1.61637700  | 0.95101700  | -2.41860000 |
| H | 1.48106500  | -1.60084500 | 0.42509900  |
| O | -0.14742700 | 0.80025200  | -0.53766300 |
| C | -0.96387700 | 0.06578100  | 0.36581400  |
| C | -0.00858300 | -0.38405900 | 1.46744000  |
| H | 0.05360600  | 0.42400800  | 2.19810100  |
| H | -0.35156400 | -1.28452100 | 1.97434300  |
| O | -1.46245000 | -0.98355100 | -0.41369000 |
| O | -1.95152900 | 0.86488300  | 0.87742300  |
| C | -2.32626700 | -1.89997400 | 0.24615000  |
| C | -2.82196700 | 1.48775400  | -0.07834100 |
| H | -3.83285100 | 1.37512800  | 0.32135200  |
| H | -2.76835400 | 0.94876100  | -1.02689700 |
| H | -2.98274700 | -1.36090700 | 0.93743900  |
| H | -1.73334600 | -2.61712400 | 0.82810700  |
| C | -3.13195600 | -2.62108200 | -0.81294600 |
| H | -2.46834300 | -3.12427200 | -1.51895700 |
| H | -3.78144200 | -3.36886500 | -0.35134100 |
| H | -3.75267600 | -1.91466900 | -1.36811100 |
| C | -2.46791000 | 2.95178200  | -0.25268500 |
| H | -2.49893200 | 3.46852100  | 0.70905600  |
| H | -1.46633800 | 3.05215200  | -0.67218400 |
| H | -3.18262200 | 3.43225400  | -0.92688900 |

**30-exp**

E = -731.793099029 a.u.

|   |             |             |             |
|---|-------------|-------------|-------------|
| C | -1.28921600 | -1.70620500 | -1.13517800 |
| C | -0.81316900 | -2.54742400 | 0.03461200  |
| C | -0.28208500 | -1.91046000 | 1.06769100  |

|   |             |             |             |
|---|-------------|-------------|-------------|
| C | -0.16483300 | -0.40783300 | 0.99141900  |
| C | 0.54679700  | -0.05683000 | -0.36401000 |
| C | -0.17029300 | -0.71631100 | -1.55888000 |
| C | -2.54965100 | -0.96079500 | -0.75632900 |
| C | -2.64112900 | -0.09295700 | 0.25379800  |
| C | -1.51670300 | 0.28713200  | 1.14468300  |
| H | -1.51154600 | -2.34641900 | -1.99005400 |
| H | -0.91627400 | -3.62542100 | -0.00036500 |
| H | 0.09310400  | -2.42824800 | 1.94226700  |
| H | 0.44367000  | -0.00426700 | 1.79929500  |
| H | -3.57461000 | 0.41532900  | 0.47186300  |
| O | -1.66960000 | 1.15229600  | 1.97968700  |
| H | -3.43383200 | -1.14509500 | -1.36100500 |
| H | 0.59654300  | -1.25591000 | -2.11327600 |
| H | -0.59078800 | 0.03747200  | -2.22477400 |
| O | 1.82986400  | -0.61538900 | -0.37226100 |
| O | 0.72726600  | 1.33776300  | -0.45549800 |
| C | -0.26689600 | 2.18590400  | -1.00674300 |
| H | -0.07179100 | 2.32275200  | -2.07864900 |
| C | 2.73727000  | -0.20336300 | 0.64172900  |
| H | 2.54444400  | -0.76631100 | 1.56490400  |
| H | -1.26692500 | 1.75356000  | -0.90744600 |
| H | 2.60941900  | 0.86188800  | 0.84913500  |
| C | 4.13652700  | -0.48926100 | 0.13993900  |
| H | 4.33919800  | 0.08969600  | -0.76317300 |
| H | 4.87456900  | -0.22330900 | 0.90087900  |
| H | 4.24834200  | -1.54961900 | -0.09720200 |
| C | -0.20935700 | 3.50992700  | -0.27474500 |
| H | 0.79337900  | 3.93766800  | -0.33981500 |
| H | -0.91851400 | 4.21711200  | -0.71292300 |
| H | -0.46219100 | 3.36260400  | 0.77699900  |
